# Supplementary material for: Tuning of the height of energy barrier between locally-excited and charge transfer states by altering the fusing position ofo-carborane in phenylnaphthalene
Source: Royal Society of Chemistry journal article supplement (doi:10.1039/d3cp00334e), 2023-01-01
Supplement: d3cp00334e1.pdf [file d3cp00334e1.pdf]

## Synthesis

### General.

All synthetic procedures were performed under N<sub>2</sub> atmosphere. <sup>1</sup>H, <sup>13</sup>C, and <sup>11</sup>B NMR spectra were recorded on JEOL JNM-AL400 (Charts S1–S6, S9–S12, and S14–S19) and JNM-ECZ400 (Charts S7, S8 and S20) instruments at 400, 100, and 128 MHz, respectively. <sup>13</sup>C NMR spectra in Chart S13 was recorded at the Technical Support Office (Department of Synthetic Chemistry and Biological Chemistry, Graduate School of Engineering, Kyoto University) by a JNM-ECZ600R instrument at 150 MHz. Samples were analyzed in CDCl<sub>3</sub> and CD<sub>2</sub>Cl<sub>2</sub>. The <sup>1</sup>H and <sup>13</sup>C chemical shift values were expressed relative to Me<sub>4</sub>Si as an internal standard in CDCl<sub>3</sub> and residual solvent peak as an internal stanrard in CD<sub>2</sub>Cl<sub>2</sub>. The <sup>11</sup>B chemical shift values were expressed relative to BF<sub>3</sub>·Et<sub>2</sub>O as an external standard. Analytical thin-layer chromatography (TLC) was performed with silica gel 60 Merck F254 plates. Column chromatography was performed with Wakogel® C-300 silica gel. High-resolution mass (HRMS) spectrometry was performed at the Technical Support Office (Department of Synthetic Chemistry and Biological Chemistry, Graduate School of Engineering, Kyoto University), and the HRMS spectra were obtained on a Thermo Fisher Scientific EXACTIVE spectrometer for atmospheric pressure chemical ionization (APCI) and SHIMADZU GCMS-QP2010SE spectrometer for electron ionization (EI).

**Materials.** Tetrahydrofuran (THF) was purchased and purified by passage through purification column under N<sub>2</sub> pressure. Decaborane(14), *N,N*-dimethylaniline, *n*-butyllithium (1.6 M in *n*-hexane), palladium(II) acetate, tri-*tert*-butylphosphonium tetrafluoroborate, cesium carbonate, dimethyl (1-diazo-2-oxopropyl)phosphonate, methanol (MeOH), chloroform (CHCl<sub>3</sub>), *n*-hexane, ethyl acetate (AcOEt), toluene, acetonitrile (MeCN), and dimethylformamide (DMF) were obtained commercially and used without purification. 1-Bromo-2-(2-bromophenyl)-naphthalene was synthesized and characterized according to the literature.<sup>1</sup>

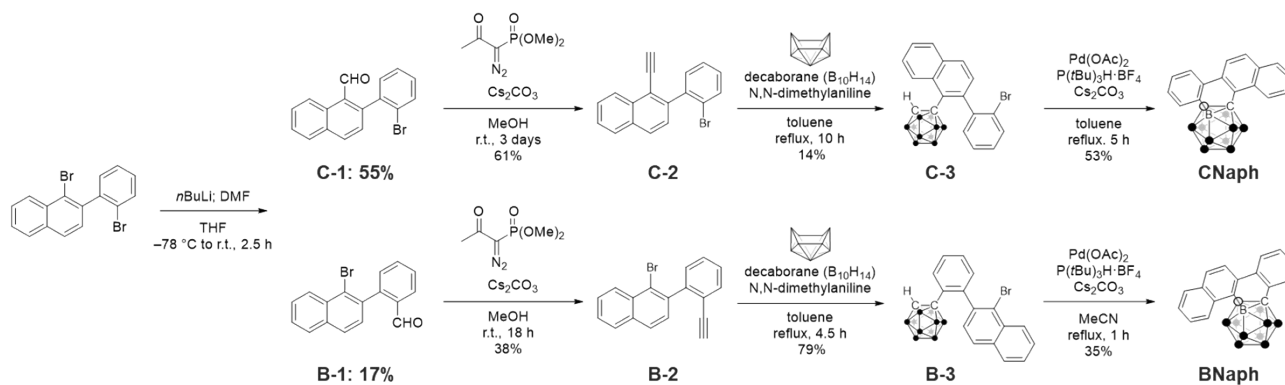

**Scheme S1.** Overall synthetic routes for **CNaph** and **BNaph**.

**Synthesis of C-1 and B-1.** *n*BuLi (1.9 mL, 1.6 M in hexane, 3.04 mmol) was added dropwise to the mixture of 1-bromo-2-(2-bromophenyl)-naphthalene (1.083 g, 2.98 mmol) and anhydrous THF (21 mL) at  $-78$  °C. After addition, the mixture was stirred for 1 h at the same temperature, then DMF (0.517 g, 0.55 mL, 7.07 mmol) was added. The mixture was stirred at room temperature for 2.5 h. After addition of sat.  $\text{NH}_4\text{Cl}$  aq, the resulting mixture was extracted with AcOEt. The organic layer was washed with brine, dried with  $\text{Na}_2\text{SO}_4$ , filtrated and concentrated. The crude product was purified by silica gel column chromatography (*n*-hexane/toluene = 1/1 (v/v)) to give **C-1** as a dark yellow oil (0.508 g, 1.63 mmol, 55 %) and **B-1** as a yellow oil (0.155 g, 0.496 mmol, 17 %). **C-1**:  $^1\text{H}$  NMR (400 MHz,  $\text{CDCl}_3$ ):  $\delta$  (ppm) 10.14 (1H, s), 9.33 (1H, d,  $J = 8.4$  Hz), 8.11 (1H, d,  $J = 8.8$  Hz), 7.95–7.93 (1H, m), 7.74–7.70 (2H, m), 7.64–7.60 (1H, m), 7.45–7.31 (4H, m).  $^{13}\text{C}$  NMR (100 MHz,  $\text{CDCl}_3$ ):  $\delta$  (ppm) 193.8, 147.4, 139.7, 134.2, 133.5, 132.9, 131.9, 130.3, 129.9, 129.4, 128.5, 128.4, 128.1, 127.3, 127.1, 126.1, 123.6. HRMS (*p*-APCI): Calcd. for  $\text{C}_{17}\text{H}_{12}\text{BrO}$   $[\text{M}+\text{H}]^+$   $m/z$  311.0066, found  $m/z$  311.0071. **B-1**:  $^1\text{H}$  NMR (400 MHz,  $\text{CDCl}_3$ ):  $\delta$  (ppm) 9.80 (1H, s), 8.38 (1H, dd,  $J = 8.4$  Hz, 0.4 Hz), 8.08 (1H, dd,  $J = 8.0$  Hz, 1.6 Hz), 7.93–7.89 (2H, m), 7.73–7.57 (4H, m), 7.43–7.38 (2H, m).  $^{13}\text{C}$  NMR (100 MHz,  $\text{CDCl}_3$ ):  $\delta$  (ppm) 191.5, 145.7, 136.9, 133.9, 133.7, 133.6, 132.1, 13.8, 128.5, 128.3, 128.2, 128.2, 127.7, 127.7, 127.3, 127.2, 124.0. HRMS (*p*-APCI): Calcd. for  $\text{C}_{17}\text{H}_{12}\text{BrO}$   $[\text{M}+\text{H}]^+$   $m/z$  311.0066, found  $m/z$  311.0056.

**Synthesis of C-2.** Dimethyl(1-diazo-2-oxopropyl)phosphonate (0.122 g, 0.095 mL, 0.63 mmol) was added in one portion to the suspension of **C-1** (0.154 g, 0.49 mmol),  $\text{Cs}_2\text{CO}_3$  (0.408 g, 1.25 mmol), and MeOH (10 mL). The mixture was stirred for 3 days at room temperature, then excess water was added. The resulting mixture was extracted with AcOEt, washed with brine, dried with  $\text{Na}_2\text{SO}_4$ , filtrated and concentrated. The crude product was purified by silica gel column chromatography

(eluent: *n*-hexane/AcOEt = 20/1 (v/v)) to give **C-2** as a colorless oil (0.094 g, 0.30 mmol, 61%). <sup>1</sup>H NMR (400 MHz, CD<sub>2</sub>Cl<sub>2</sub>): δ (ppm) 8.44 (1H, d, *J* = 8.4 Hz), 7.94–7.92 (2H), 7.74–7.72 (1H, m), 7.67–7.57 (2H, m), 7.44–7.39 (3H), m, 7.33–7.29 (1H, m), 3.45 (1H, s). <sup>13</sup>C NMR (100 MHz, CD<sub>2</sub>Cl<sub>2</sub>): δ (ppm) 143.5, 142.2, 133.9, 133.0, 132.8, 131.9, 129.7, 128.9, 128.6, 127.8, 127.7, 127.5, 127.1, 126.7, 123.5, 119.0, 86.2, 80.4. HRMS (*p*-APCI): Calcd. for C<sub>18</sub>H<sub>12</sub>Br [M+H]<sup>+</sup> *m/z* 307.0117, found *m/z* 307.0121.

**Synthesis of B-2.** Dimethyl(1-diazo-2-oxopropyl)phosphonate (0.128 g, 0.10 mL, 0.67 mmol) was added in one portion to the suspension of **B-1** (0.183 g, 0.59 mmol), Cs<sub>2</sub>CO<sub>3</sub> (0.351 g, 1.07 mmol), and MeOH (1.3 mL). The mixture was stirred for 18 h at room temperature, then excess water was added. The resulting mixture was extracted with AcOEt, washed with brine, dried with Na<sub>2</sub>SO<sub>4</sub>, filtrated and concentrated. The crude product was purified by silica gel column chromatography (eluent: *n*-hexane/AcOEt = 20/1 (v/v)) to give **B-2** as a yellow oil (0.069 g, 0.22 mmol, 38%). <sup>1</sup>H NMR (400 MHz, CDCl<sub>3</sub>): δ (ppm) 8.40 (1H, d, *J* = 8.8 Hz), 7.90–7.87 (1H, m), 7.85 (1H, d, *J* = 8.4 Hz), 7.66–7.61 (2H, m), 7.58 (1H, ddd, *J* = 7.6 Hz, 7.4 Hz, 1.2 Hz), 7.47–7.33 (4H, m), 2.87 (1H, s). <sup>13</sup>C NMR (100 MHz, CDCl<sub>3</sub>): δ (ppm) 143.2, 139.6, 133.9, 133.0, 132.4, 129.9, 128.5, 128.3, 128.2, 127.9, 127.7, 127.6, 127.2, 126.7, 123.3, 121.7, 82.2, 80.5. HRMS (*p*-EI): Calcd. for C<sub>18</sub>H<sub>11</sub>Br [M+H]<sup>+</sup> *m/z* 306.0044, found *m/z* 306.0038.

**Synthesis of C-3.** The mixture of **C-2** (0.591 g, 1.92 mmol), decaborane(14) (0.253 g, 2.06 mmol), and *N,N*-dimethylaniline (0.43 mL, 3.4 mmol) were dissolved in toluene (19 mL) at room temperature. The mixture was refluxed for 10 h. After cooling to room temperature, the mixture was filtrated and evaporated. The crude product was purified by silica gel column chromatography (eluent: *n*-hexane), and the obtained solid was XXXecrystallized from MeOH/CHCl<sub>3</sub> at 60 °C to afford **C-3** as a colorless solid (115.5 mg, 0.272 mmol, 14%). <sup>1</sup>H NMR (400 MHz, CD<sub>2</sub>Cl<sub>2</sub>): δ (ppm) 9.31 (1H, d, *J* = 8.8 Hz), 7.90–7.86 (2H, m), 7.79 (1H, dd, *J* = 8.2 Hz, 1.6 Hz), 7.63–7.56 (2H, m), 7.46–7.33 (3H, m), 7.04 (1H, d, *J* = 8.4 Hz), 4.08 (1H, s), 3.91–1.12 (10H, br). <sup>13</sup>C NMR (100 MHz, CD<sub>2</sub>Cl<sub>2</sub>): δ (ppm) 143.2, 139.3, 135.0, 134.2, 132.0, 131.7, 131.2, 130.9, 130.8, 129.5, 128.1, 127.8, 126.9, 126.72, 126.66, 123.5, 77.6, 63.3. <sup>11</sup>B NMR (128 MHz, CD<sub>2</sub>Cl<sub>2</sub>): δ (ppm) –1.28 to –4.22 (2B), –8.93 to –14.72 (8B). HRMS (*n*-APCI): Calcd. for C<sub>18</sub>H<sub>21</sub>B<sub>10</sub>Br [M]<sup>–</sup> *m/z* 426.1815, found *m/z* 426.1821.

**Synthesis of B-3.** The mixture of **B-2** (1.474 g, 4.79 mmol), decaborane(14) (0.619 g, 5.06 mmol), and *N,N*-dimethylaniline (1.1 mL, 8.7 mmol) were dissolved in toluene (48 mL) at room temperature. The mixture was refluxed for 4.5 h. After cooling to room temperature, the mixture was filtrated and evaporated. The crude product was purified by silica gel column chromatography (eluent: *n*-hexane), and the obtained solid was recrystallized from MeOH/CHCl<sub>3</sub> at 65 °C to afford **B-3** as a colorless solid (1.607 g, 3.78 mmol, 79%). <sup>1</sup>H NMR (400 MHz, CD<sub>2</sub>Cl<sub>2</sub>): δ (ppm) 8.38–8.35 (1H, m), 7.97–7.95 (1H, m), 7.92 (1H, d, *J* = 8.4 Hz), 7.84–7.78 (1H, m), 7.72 (1H, ddd, *J* = 7.7 Hz, 7.6 Hz, 1.6 Hz), 7.66 (1H, ddd, *J* = 7.6 Hz, 7.5 Hz, 1.6 Hz), 7.49–7.41 (2H, m), 7.37 (1H, d, 8.0 Hz), 7.06–7.03 (1H, m), 3.41 (1H, s), 3.31–1.00 (10H, br). <sup>13</sup>C NMR (150 MHz, CD<sub>2</sub>Cl<sub>2</sub>): δ (ppm) 139.7, 139.2, 134.4, 133.3, 132.8, 132.7, 131.0, 129.4, 128.97, 128.91, 128.87, 128.2, 128.14, 128.13, 128.09, 124.9, 77.6, 58.5. <sup>11</sup>B NMR (128 MHz, CD<sub>2</sub>Cl<sub>2</sub>): δ (ppm) –3.34 to –4.42 (2B), –8.93 to –14.62 (8B). HRMS (*n*-APCI): Calcd. for C<sub>18</sub>H<sub>21</sub>B<sub>10</sub>BrCl [M+Cl]<sup>-</sup> m/z 461.1503, found m/z 461.1507.

**Synthesis of CNaph.** The mixture of **C-3** (13.9 mg, 0.033 mmol), Pd(OAc)<sub>2</sub> (0.9 mg, 0.0040 mmol), P(*t*Bu)<sub>3</sub>H·BF<sub>4</sub> (1.6 mg, 0.0055 mmol), and Cs<sub>2</sub>CO<sub>3</sub> (26.8 mg, 0.082 mmol) were dissolved in toluene (1.4 mL) at room temperature. The resulting mixture was refluxed for 5 h. After hydrolysis with water and extraction with AcOEt, the combined organic phase was washed with brine and dried over Na<sub>2</sub>SO<sub>4</sub>. After filtration, the solvent was evaporated. The residue was purified by column chromatography on a silica gel (eluent: *n*-hexane/AcOEt = 10/1 (v/v)). After evaporation of solvents, the desired product was isolated with recrystallization from *n*-hexane (75 °C) as a colorless solid (6.0 mg, 0.017 mmol, 53%). <sup>1</sup>H NMR (400 MHz, CDCl<sub>3</sub>): δ (ppm) 9.47 (1H, d, *J* = 9.2 Hz), 8.35 (1H, d, *J* = 8.8 Hz), 8.19 (1H, d, *J* = 8.4 Hz), 8.08 (1H, dd, *J* = 7.6 Hz, 1.2 Hz), 8.03 (1H, d, 8.8 Hz), 7.88 (1H, dd, *J* = 8.2 Hz, 1.6 Hz), 7.67 (1H, ddd, *J* = 8.8 Hz, 7.9 Hz, 1.6 Hz), 7.62 (1H, ddd, *J* = 7.7 Hz, 7.6 Hz, 1.6 Hz), 7.56 (1H, dd, *J* = 7.6 Hz, 7.6 Hz), 7.53 (1H, dd, *J* = 7.2 Hz, 7.2 Hz), 3.19 (1H, s), 3.44–1.72 (9H, br). <sup>13</sup>C NMR (100 MHz, CDCl<sub>3</sub>): δ (ppm) 135.5, 135.05, 135.04, 133.9, 132.6, 131.9, 130.4, 129.1, 128.9, 127.1, 126.9, 126.5, 126.2, 124.2, 124.1, 72.8, 61.8 (C<sub>aryl</sub>–B<sub>cage</sub> signal was not observed). <sup>11</sup>B NMR (128 MHz, CDCl<sub>3</sub>): δ (ppm) –2.26 to –14.53 (10B). HRMS (*n*-APCI): Calcd. for C<sub>18</sub>H<sub>20</sub>B<sub>10</sub> [M]<sup>-</sup> m/z 346.2501, found m/z 346.2499.

**Synthesis of BNaph.** The mixture of **B-3** (0.426 g, 1.00 mmol), Pd(OAc)<sub>2</sub> (0.023 g, 0.10 mmol), P(*t*Bu)<sub>3</sub>H·BF<sub>4</sub> (0.060 g, 0.21 mmol), and Cs<sub>2</sub>CO<sub>3</sub> (0.672 g, 2.06 mmol) were dissolved in MeCN (40

mL) at room temperature. The resulting mixture was refluxed for 1 h. After hydrolysis with water and extraction with AcOEt, the combined organic phase was washed with brine and dried over Na<sub>2</sub>SO<sub>4</sub>. After filtration, the solvent was evaporated. The residue was purified by column chromatography on a silica gel (eluent: *n*-hexane). After evaporation of solvents, the desired product was isolated with recrystallization from MeOH/CHCl<sub>3</sub> (60 °C) as a colorless solid (0.121 g, 0.35 mmol, 35%). <sup>1</sup>H NMR (400 MHz, CDCl<sub>3</sub>): δ (ppm) 9.40 (1H, d, *J* = 8.8 Hz), 8.29 (1H, d, *J* = 8.4 Hz), 8.25 (1H, d, *J* = 9.2 Hz), 8.00 (1H, d, 8.8 Hz), 7.91 (1H, dd, *J* = 8.0 Hz, 1.2 Hz), 7.88 (1H, dd, *J* = 8.0 Hz, 1.2 Hz), 7.66 (1H, ddd, *J* = 8.0 Hz, 7.8 Hz, 1.6 Hz), 7.61–7.56 (2H, m), 7.42 (1H, ddd, *J* = 7.8 Hz, 7.6 Hz, 1.2 Hz), 3.13 (1H, s), 3.81–1.33 (9H, br). <sup>13</sup>C NMR (100 MHz, CDCl<sub>3</sub>): δ (ppm) 136.7, 134.6, 133.6, 133.1, 132.7, 131.4, 131.1, 129.0, 128.9, 128.5, 128.3, 127.2, 127.0, 126.7, 122.5, 74.1, 59.9 (*C*<sub>aryl</sub>–*B*<sub>cage</sub> signal was not observed). <sup>11</sup>B NMR (128 MHz, CDCl<sub>3</sub>): δ (ppm) –2.62 (1B, d, *J* = 150.0 Hz), –5.23 (1B, d, *J* = 148.6 Hz), –7.58 to –14.59 (8B). HRMS (*n*-APCI): Calcd. for C<sub>18</sub>H<sub>20</sub>B<sub>10</sub> [M]<sup>–</sup> *m/z* 346.2501, found *m/z* 346.2507.

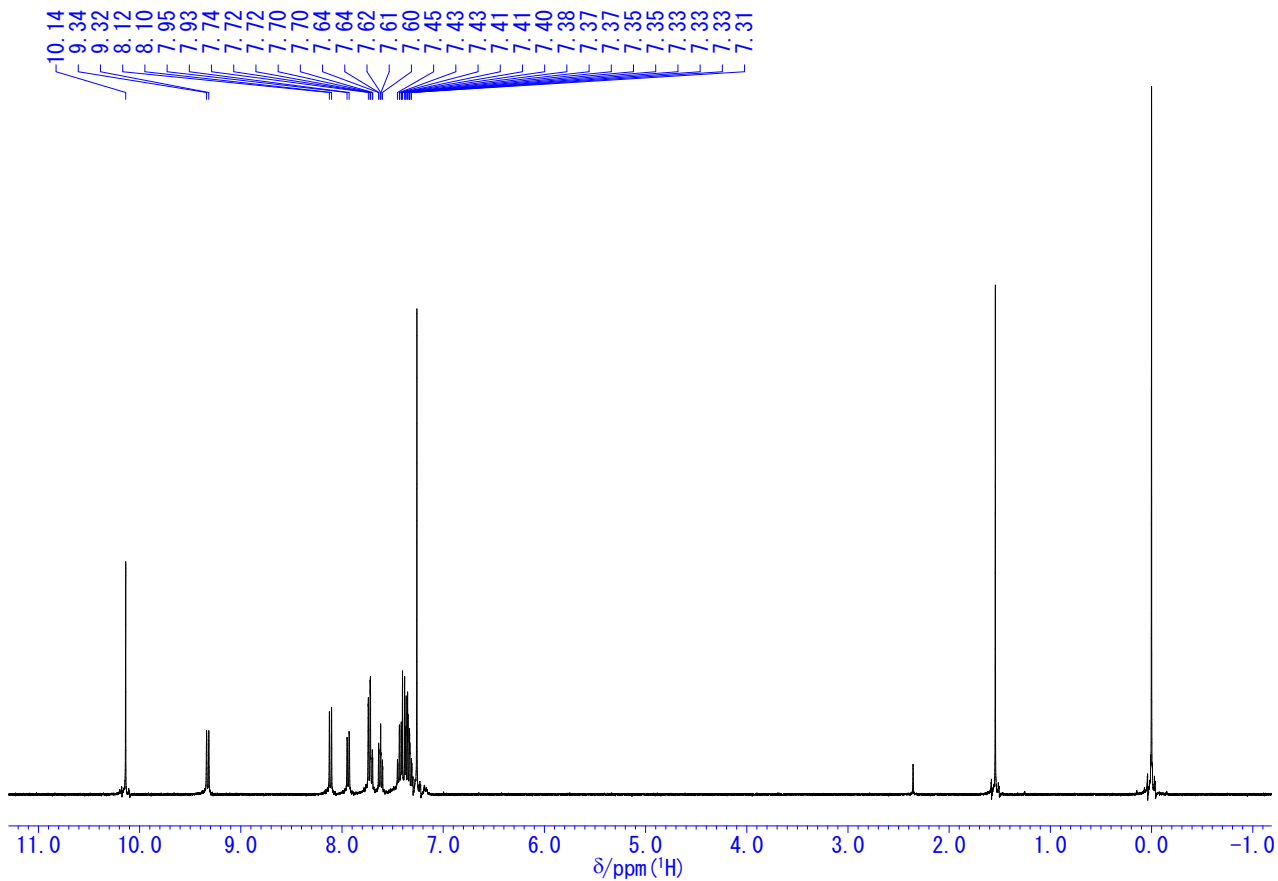

Chart S1. <sup>1</sup>H NMR spectrum of C-1 in CDCl<sub>3</sub>.

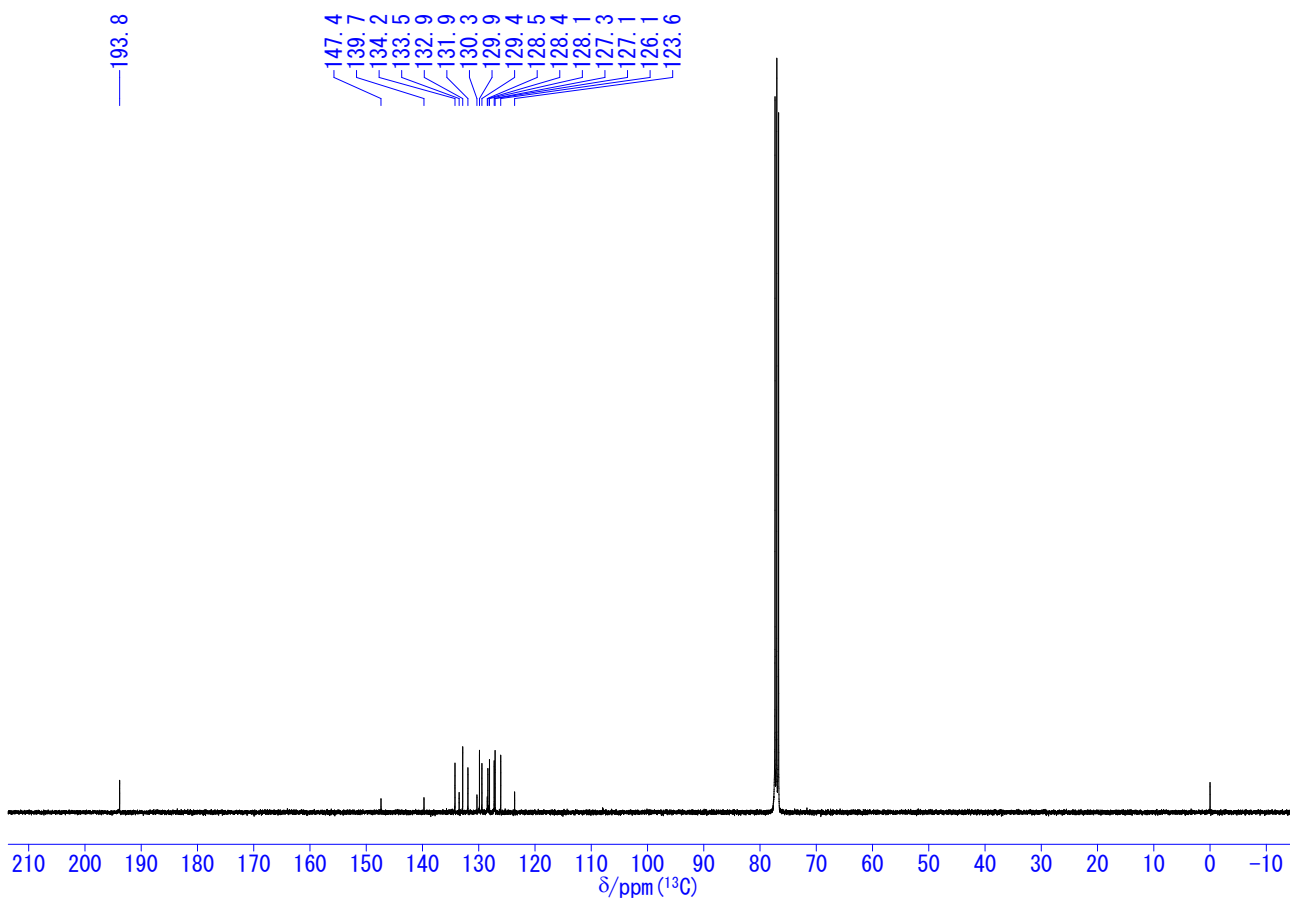

Chart S2. <sup>13</sup>C NMR spectrum of C-1 in CDCl<sub>3</sub>.

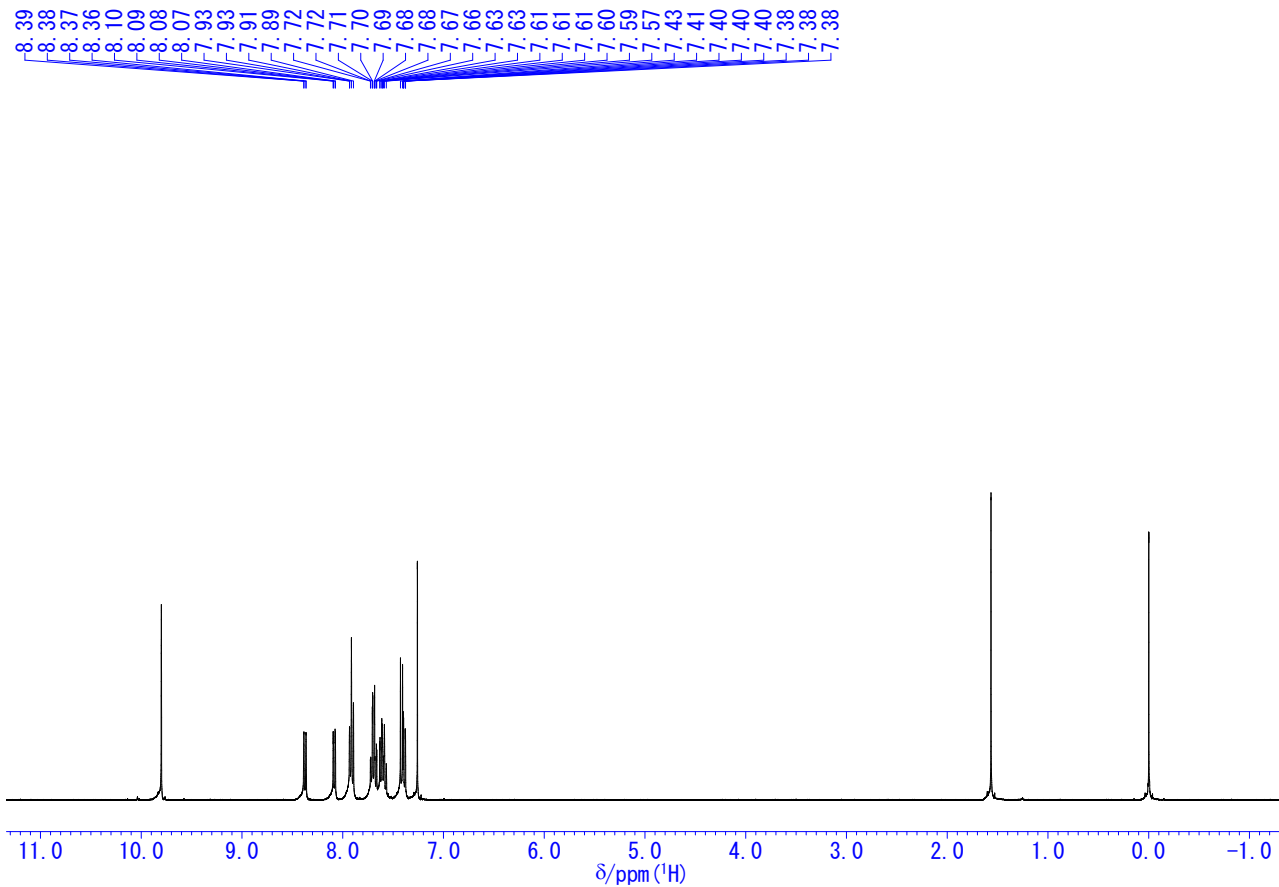

Chart S3.  $^1\text{H}$  NMR spectrum of **B-1** in  $\text{CDCl}_3$ .

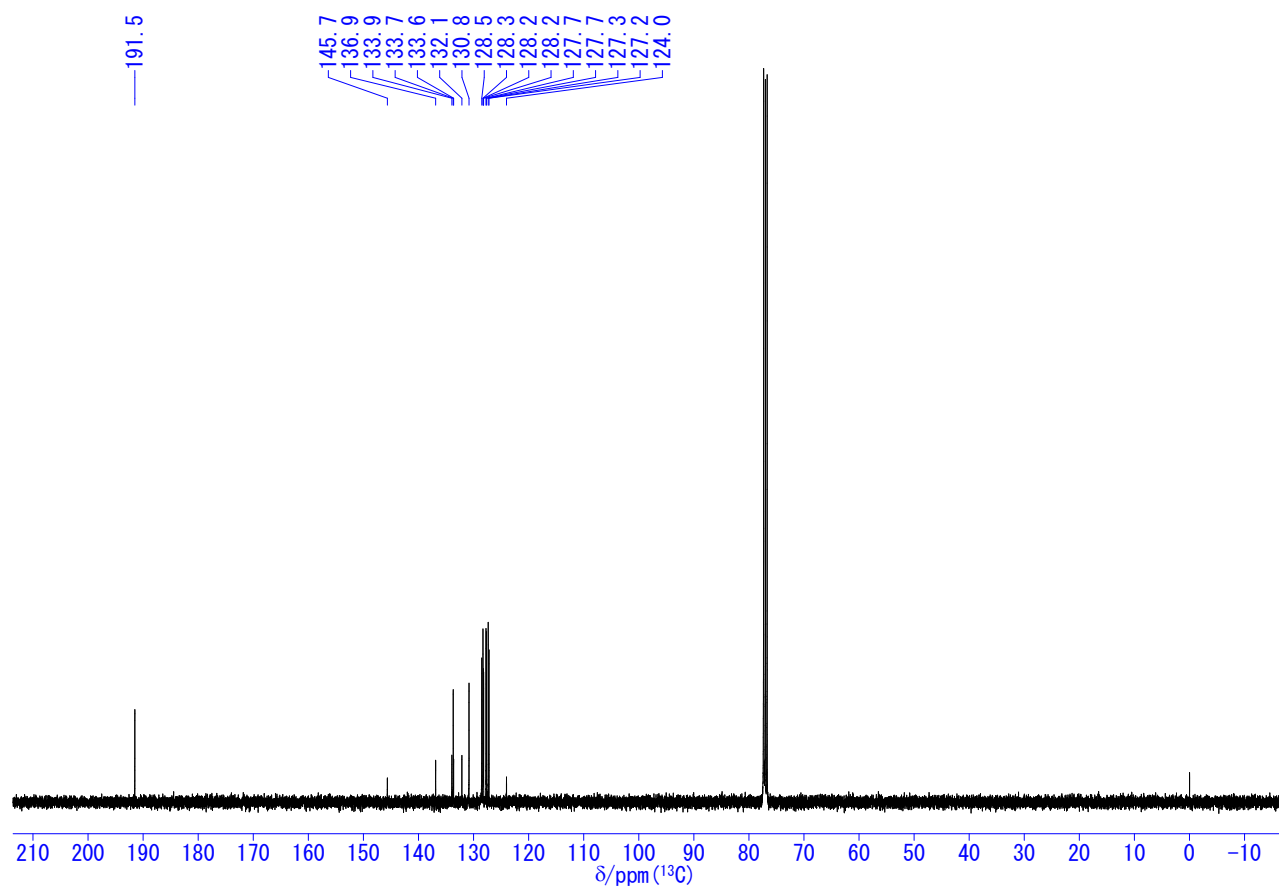

Chart S4.  $^{13}\text{C}$  NMR spectrum of **B-1** in  $\text{CDCl}_3$ .

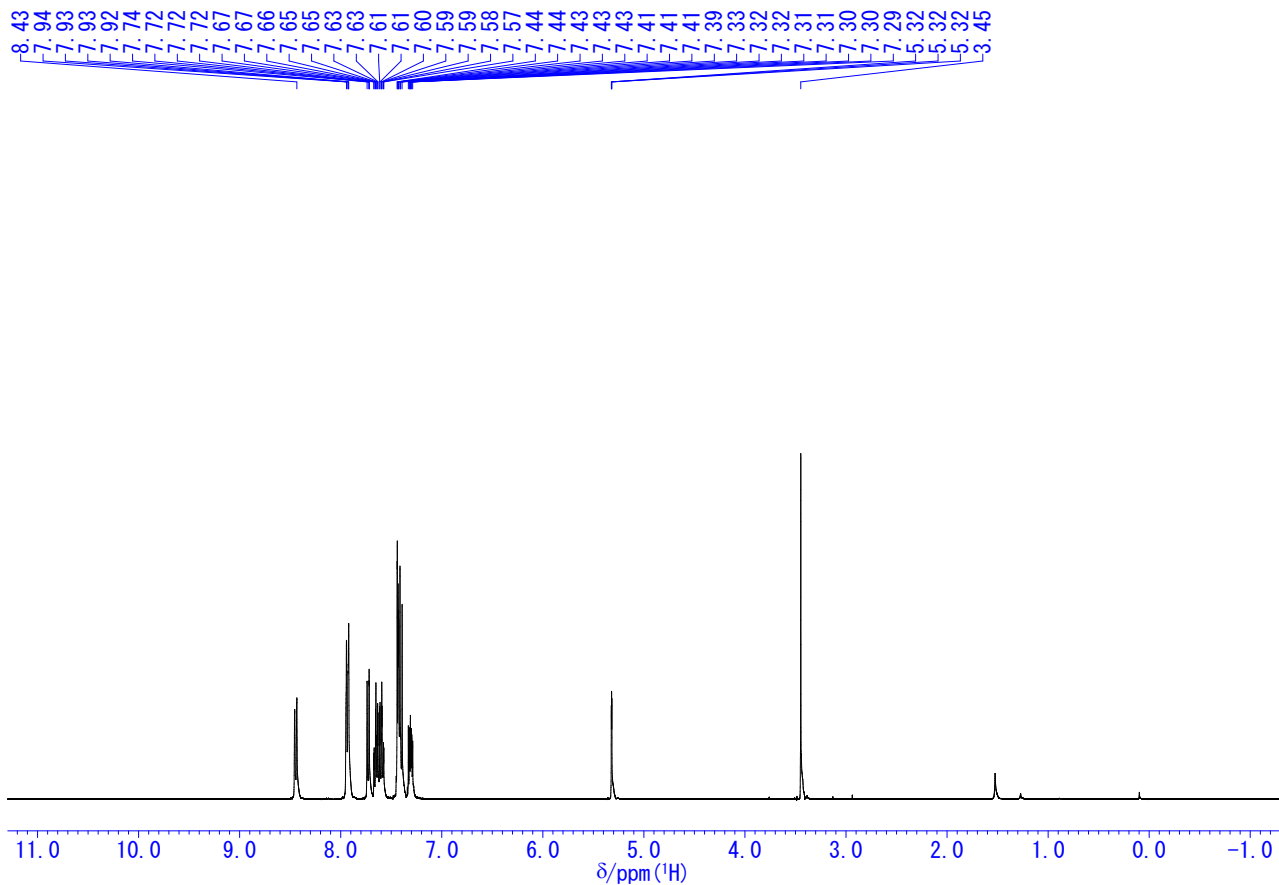

Chart S5. <sup>1</sup>H NMR spectrum of C-2 in CD<sub>2</sub>Cl<sub>2</sub>.

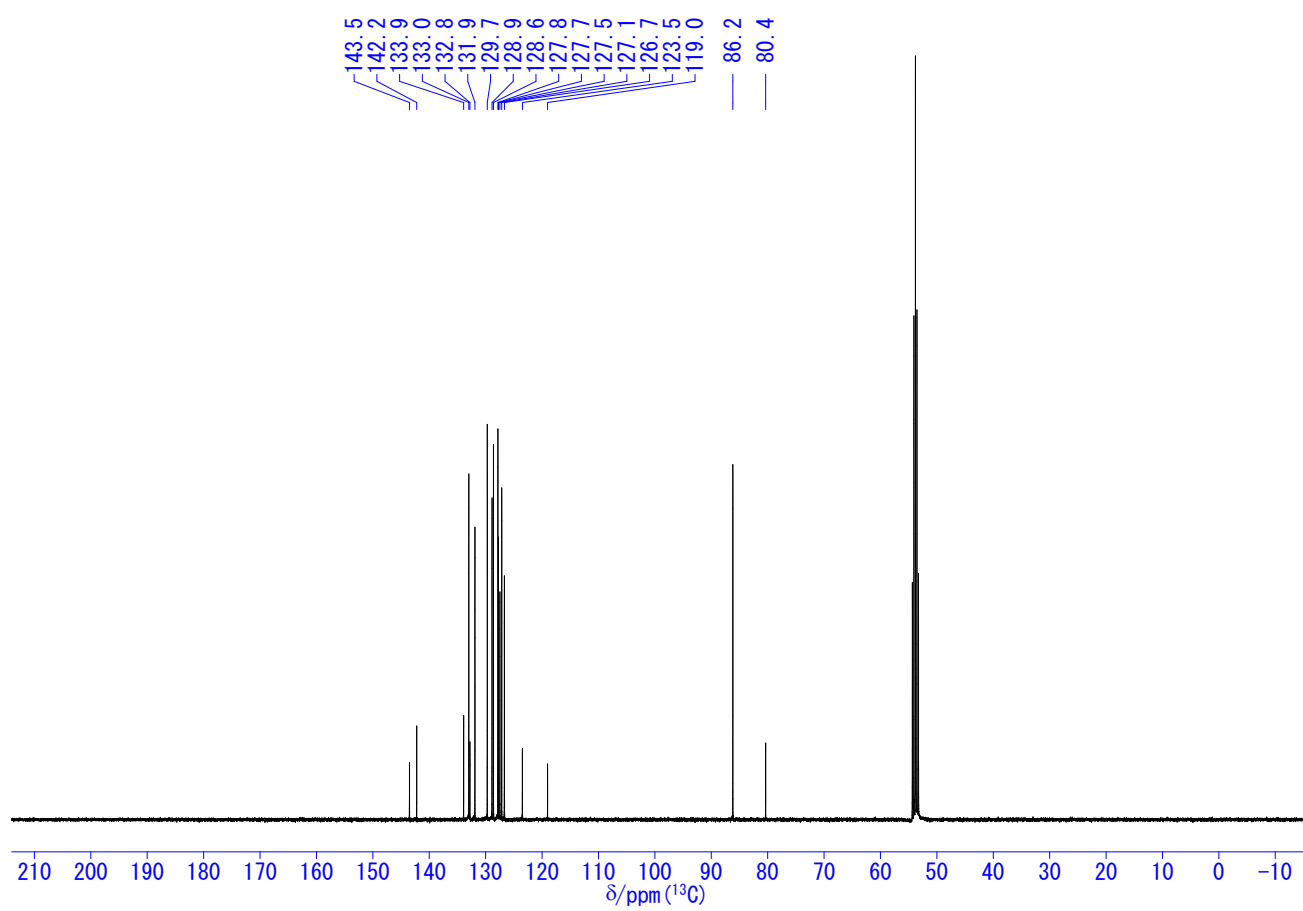

Chart S6. <sup>13</sup>C NMR spectrum of C-2 in CD<sub>2</sub>Cl<sub>2</sub>.



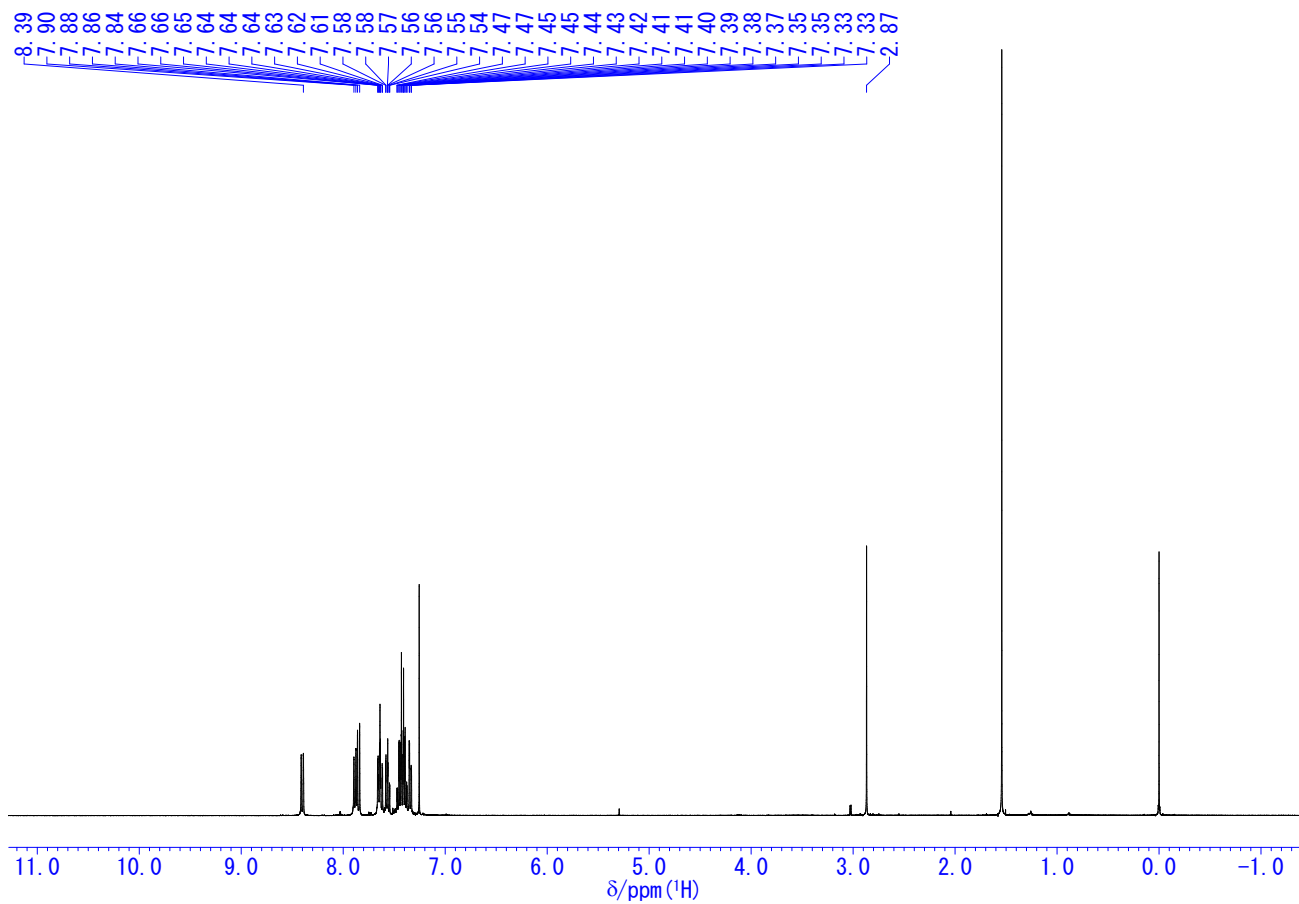

Chart S7.  $^1\text{H}$  NMR spectrum of **B-2** in  $\text{CDCl}_3$ .

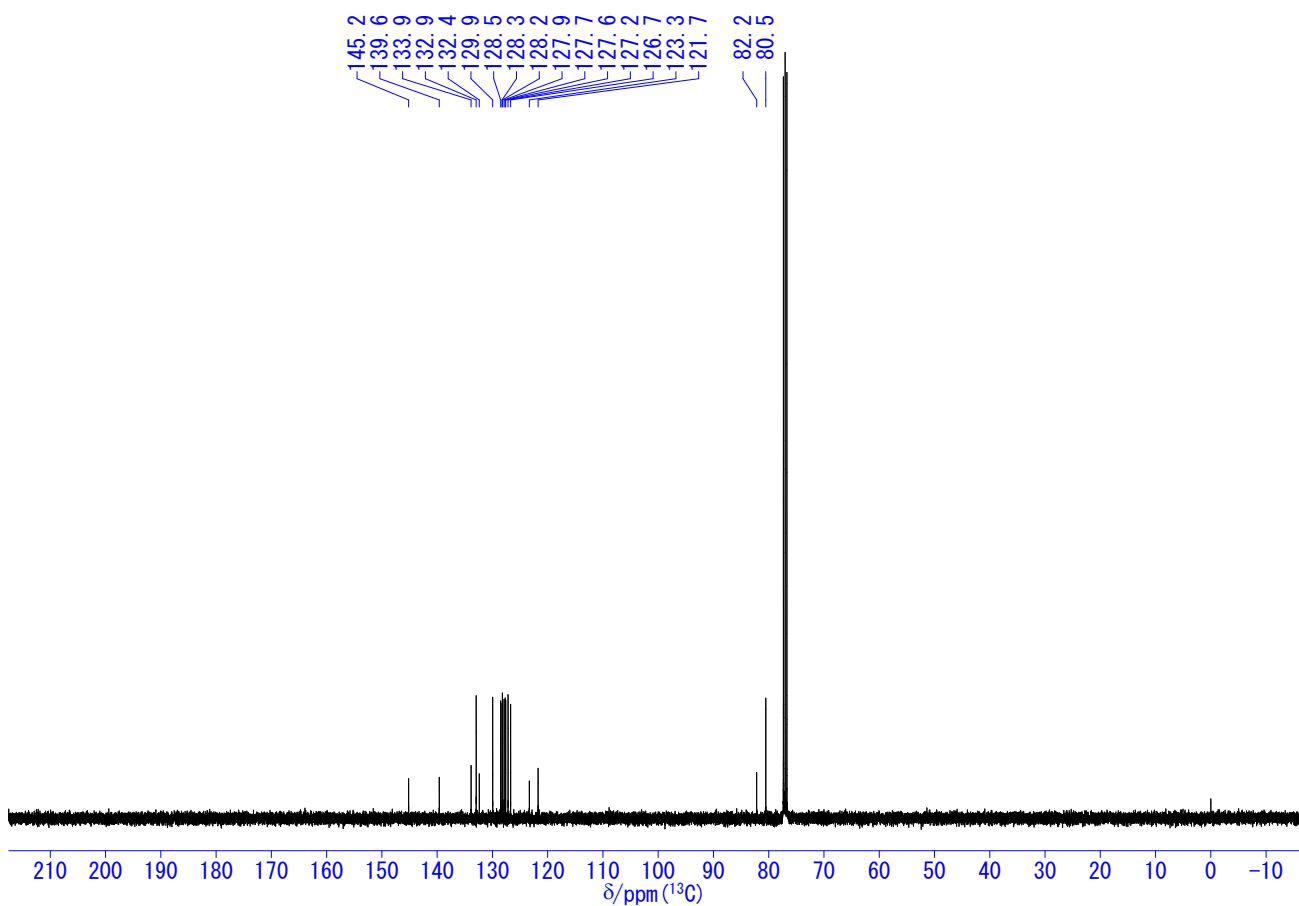

Chart S8.  $^{13}\text{C}$  NMR spectrum of **B-2** in  $\text{CDCl}_3$ .

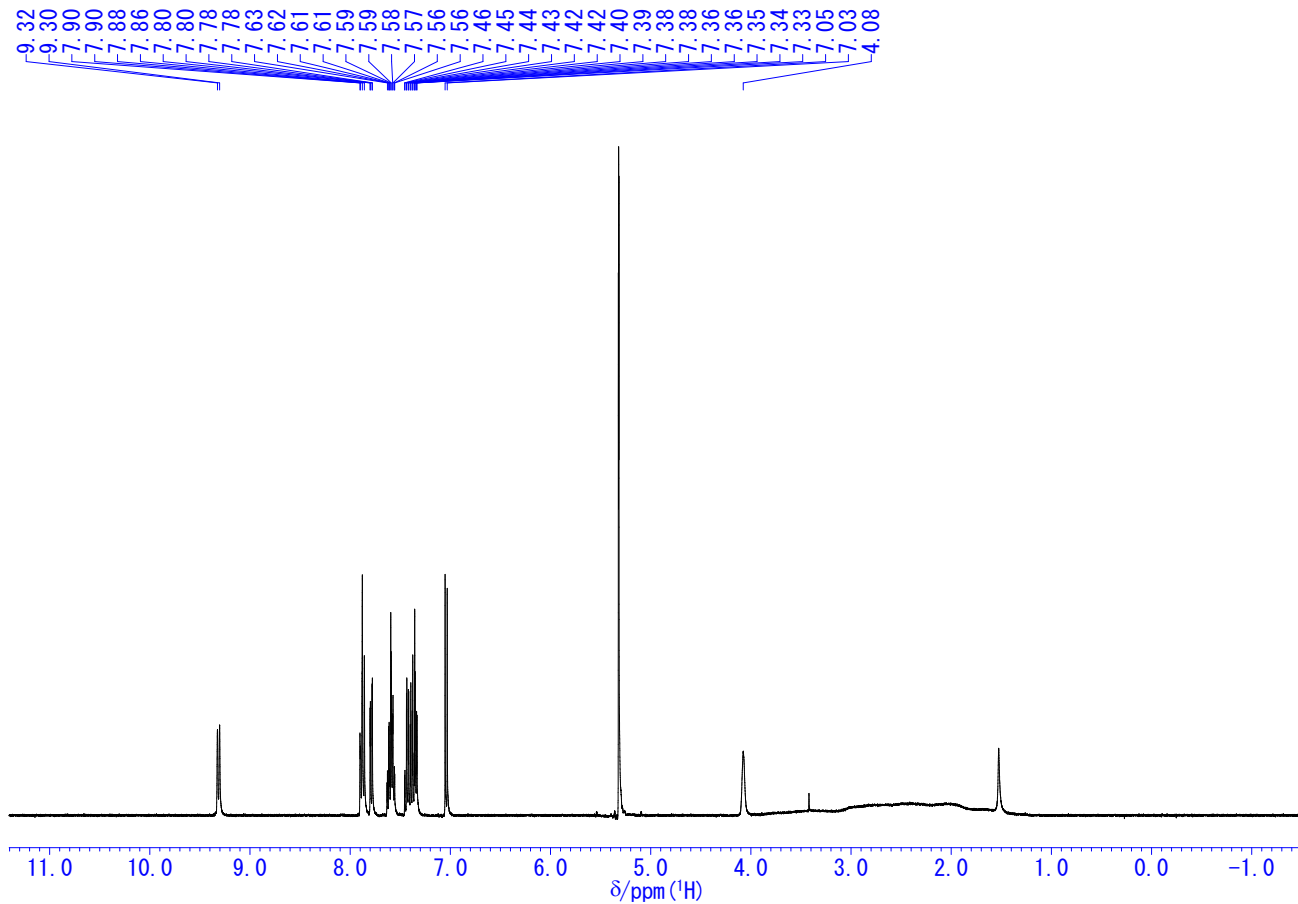

Chart S9. <sup>1</sup>H NMR spectrum of C-3 in CD<sub>2</sub>Cl<sub>2</sub>.

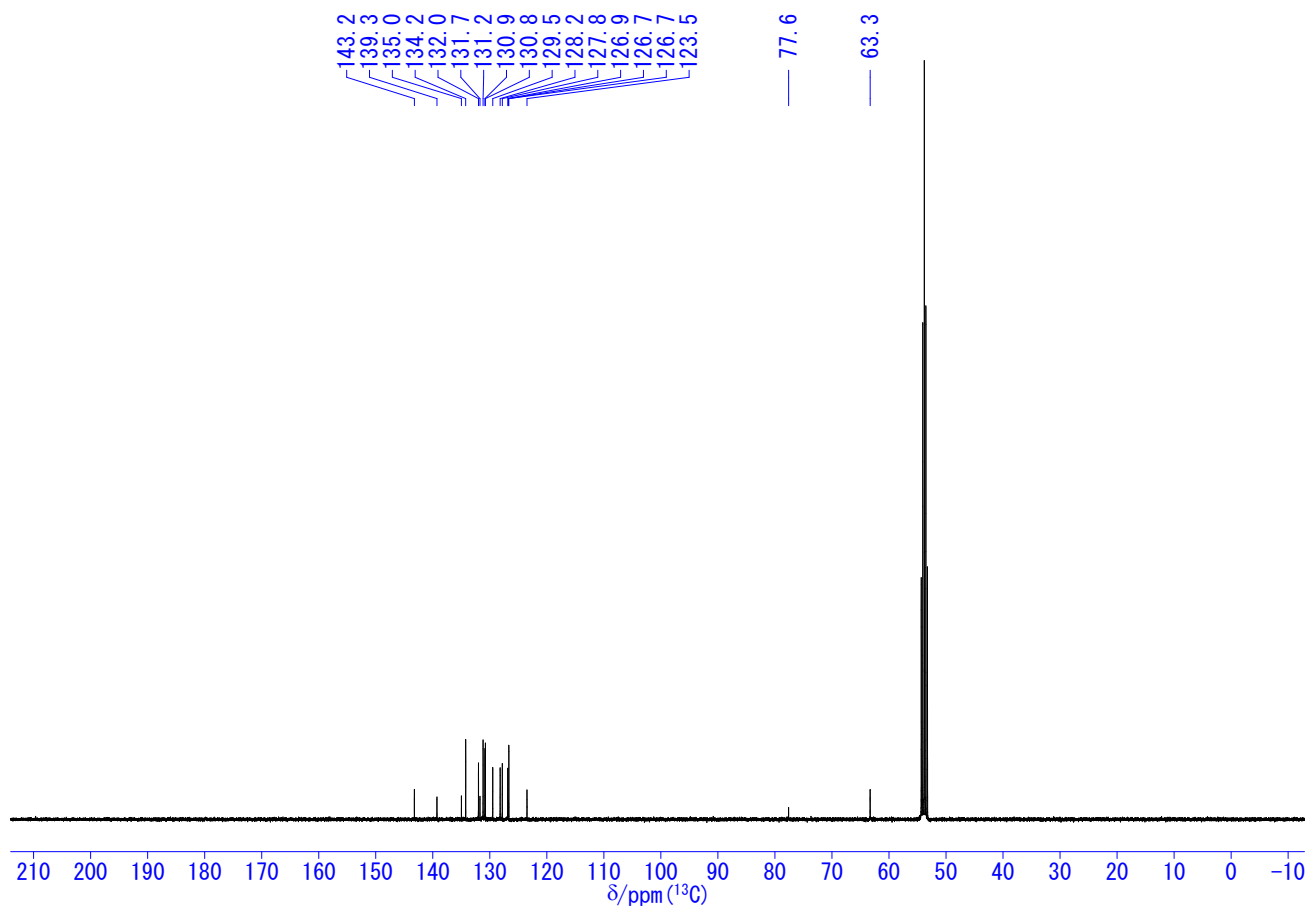

Chart S10. <sup>13</sup>C NMR spectrum of C-3 in CD<sub>2</sub>Cl<sub>2</sub>.

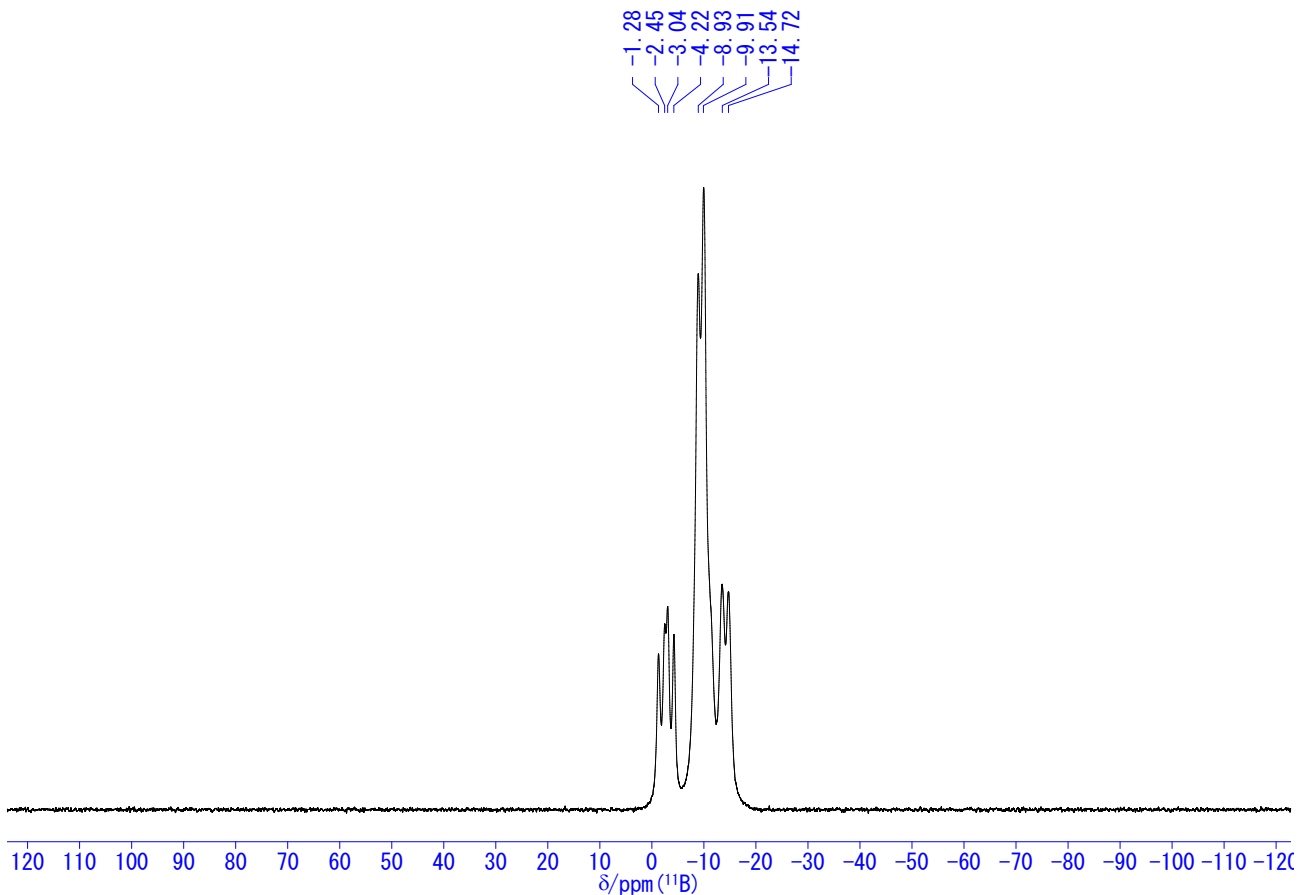

Chart S11.  $^{11}\text{B}$  NMR spectrum of C-3 in  $\text{CD}_2\text{Cl}_2$ .

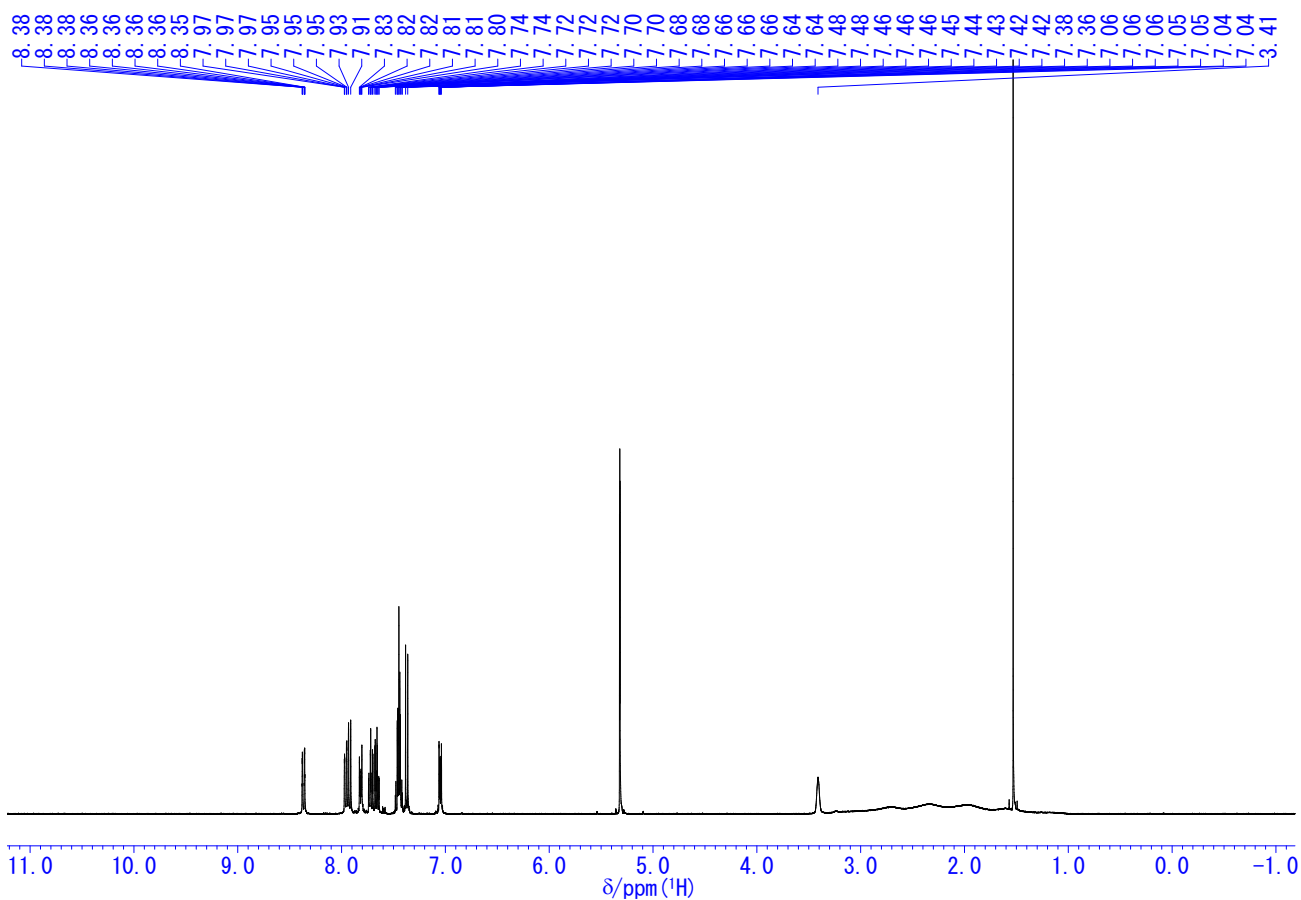

Chart S12.  $^1\text{H}$  NMR spectrum of B-3 in  $\text{CD}_2\text{Cl}_2$ .

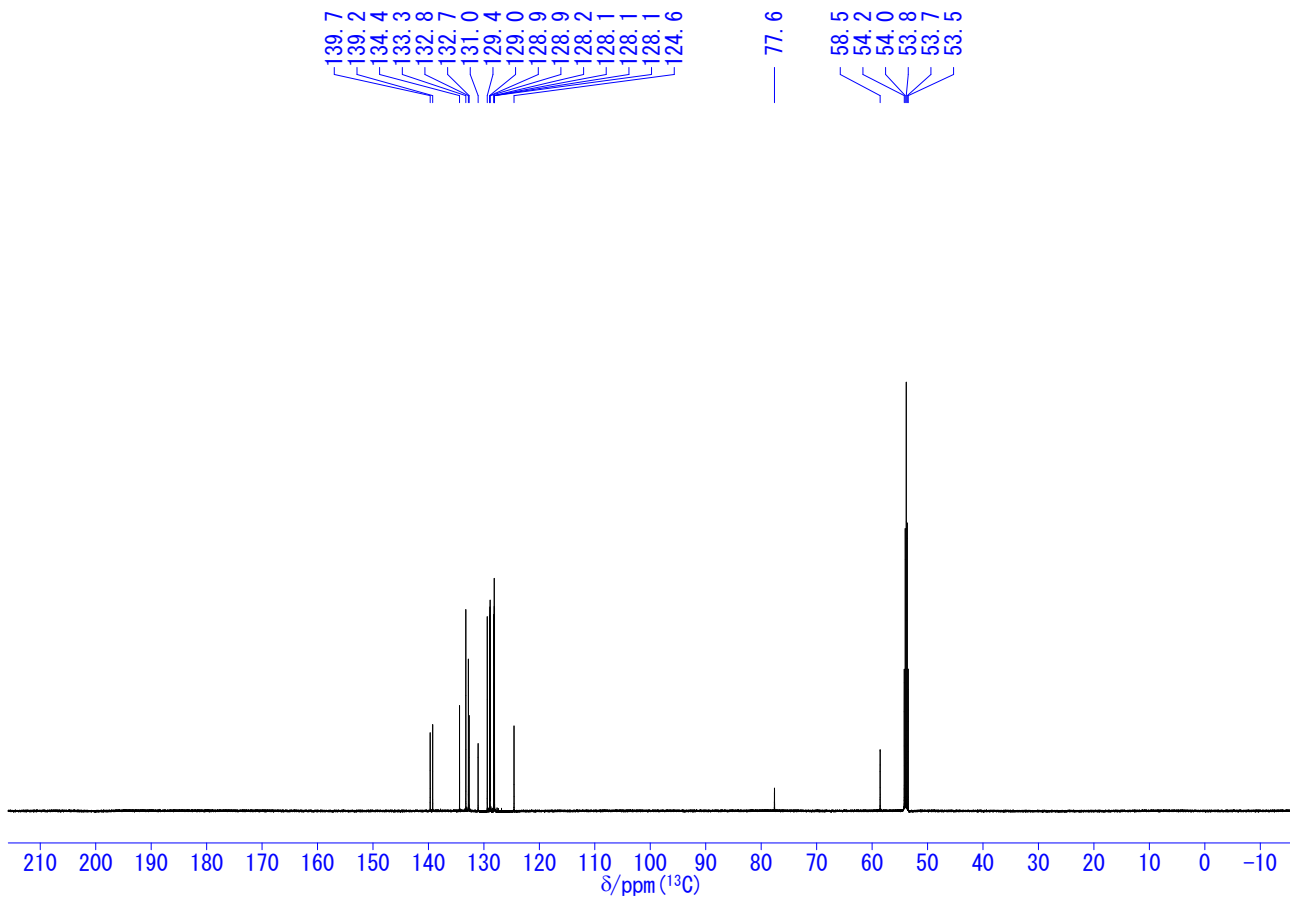

Chart S13.  $^{13}\text{C}$  NMR spectrum of **B-3** in  $\text{CD}_2\text{Cl}_2$ .

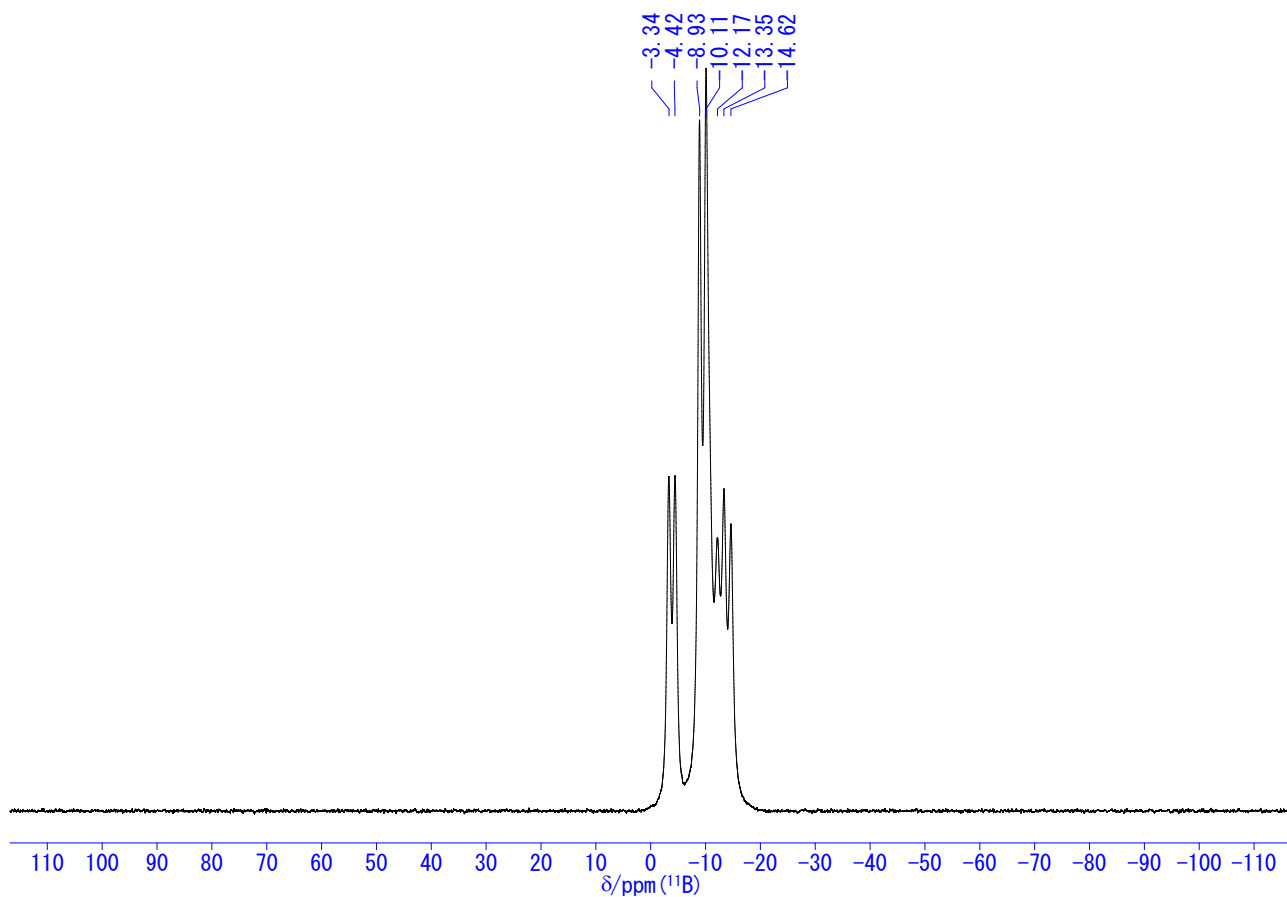

Chart S14.  $^{11}\text{B}$  NMR spectrum of **B-3** in  $\text{CD}_2\text{Cl}_2$ .

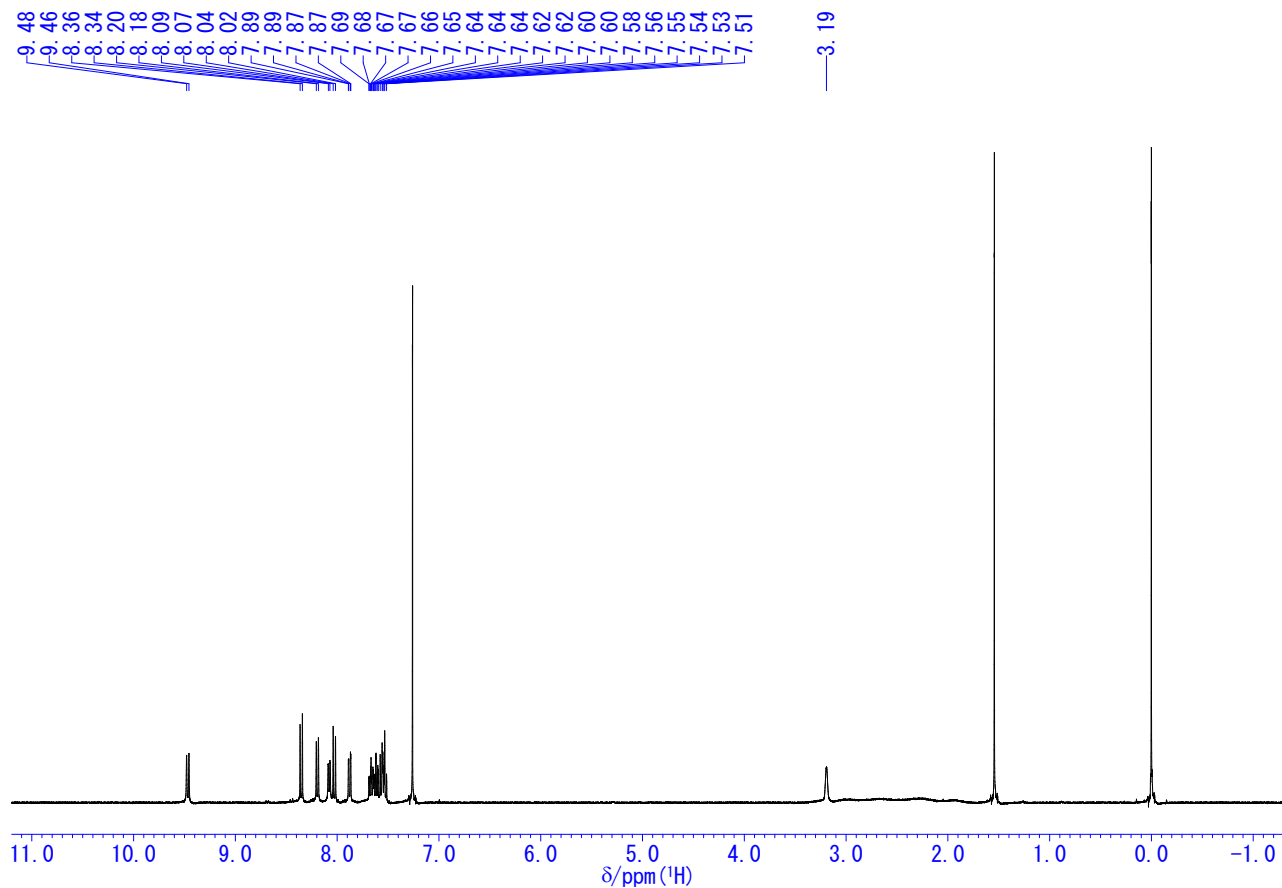

**Chart S15.**  $^1\text{H}$  NMR spectrum of CNaph in  $\text{CDCl}_3$ .

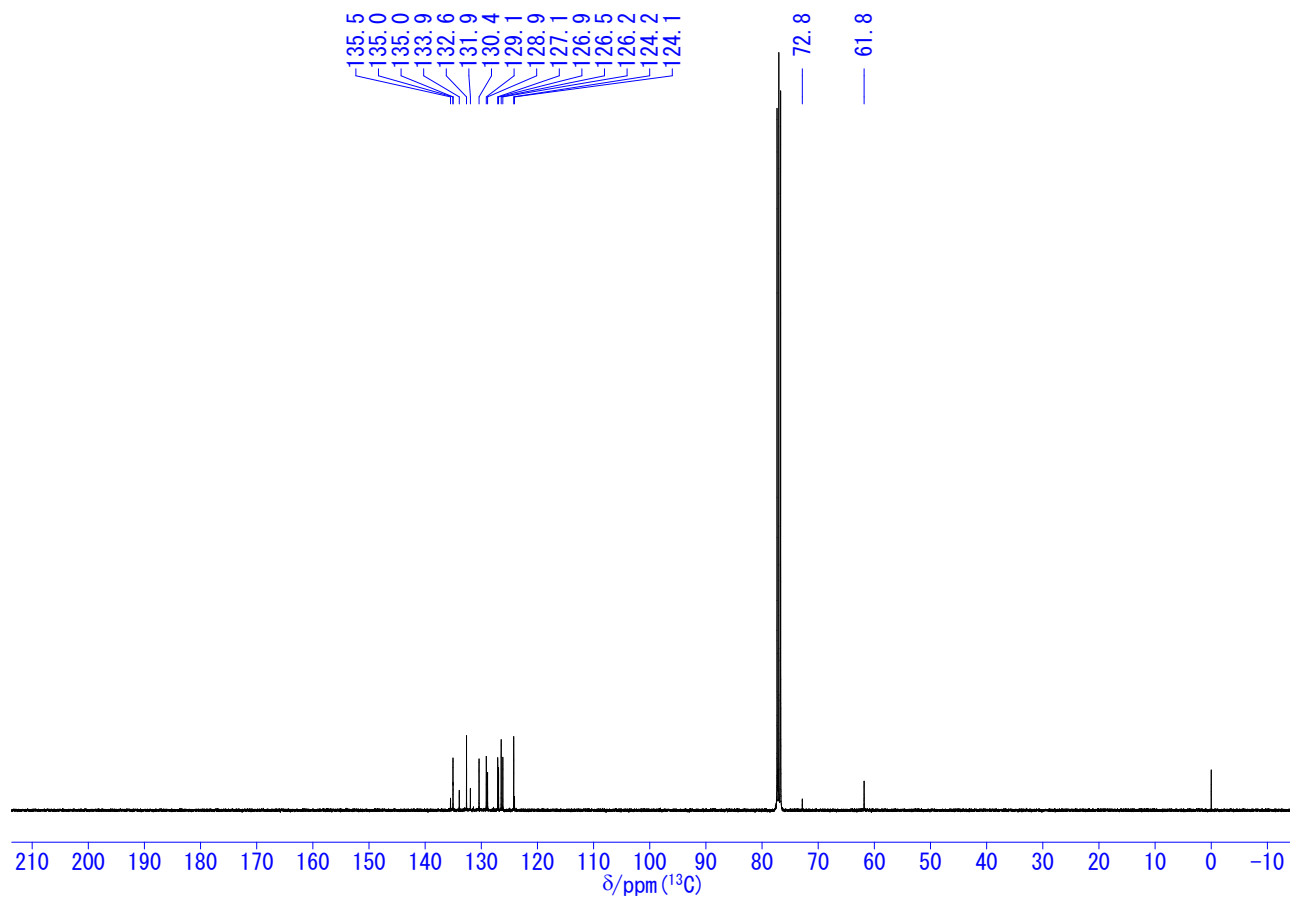

**Chart S16.**  $^{13}\text{C}$  NMR spectrum of CNaph in  $\text{CDCl}_3$ .

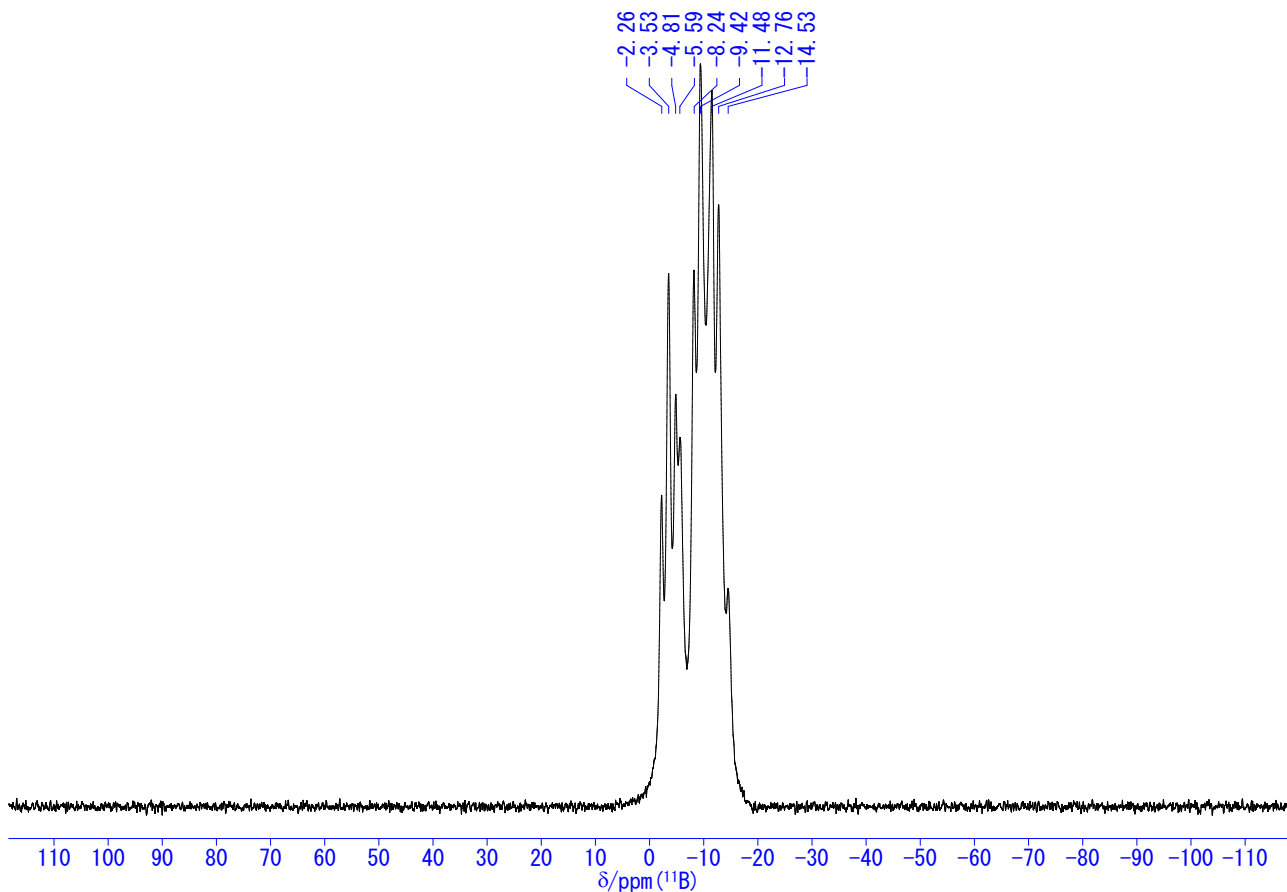

**Chart S17.**  $^{11}\text{B}$  NMR spectrum of **CNaph** in  $\text{CDCl}_3$ .

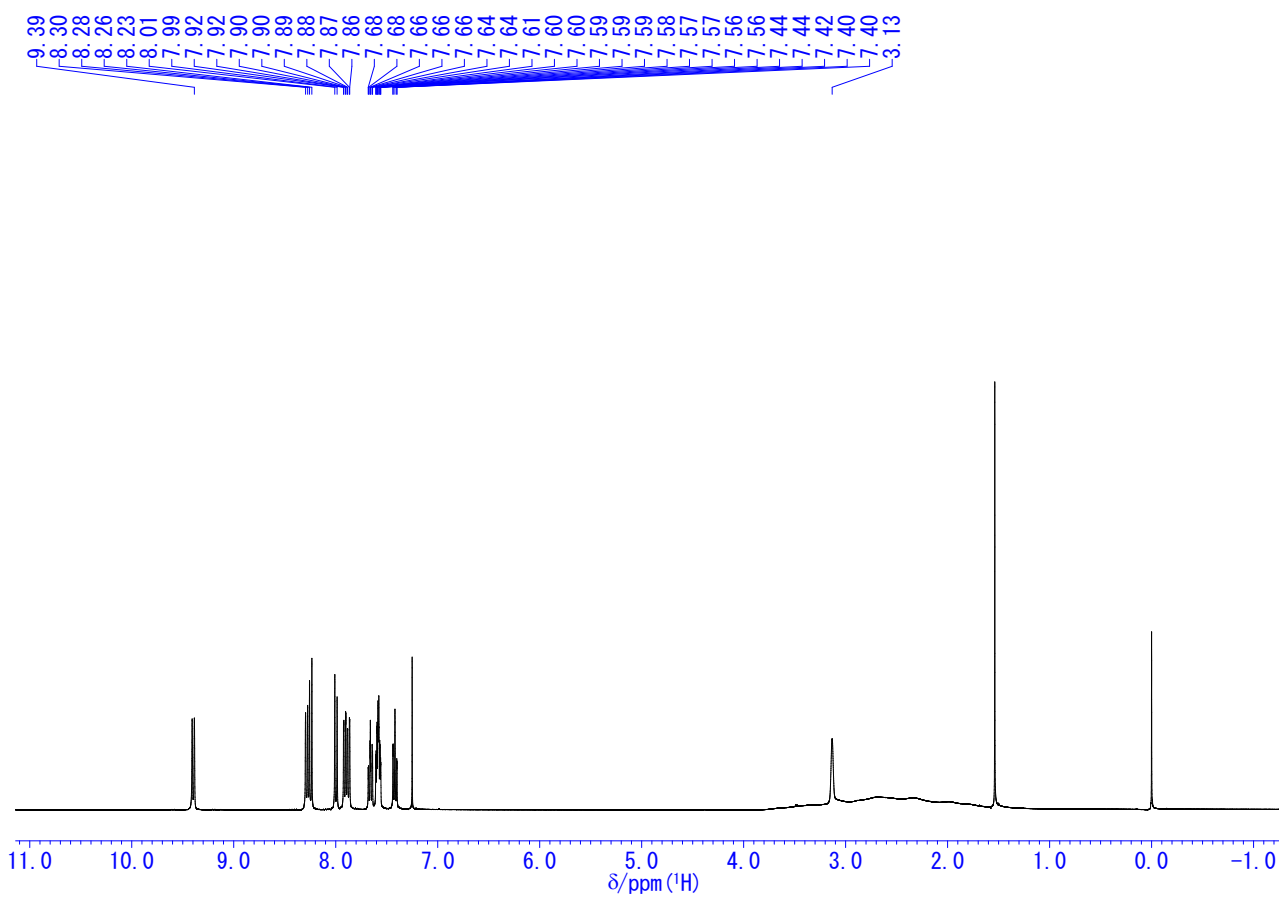

**Chart S18.**  $^1\text{H}$  NMR spectrum of **BNaph** in  $\text{CDCl}_3$ .

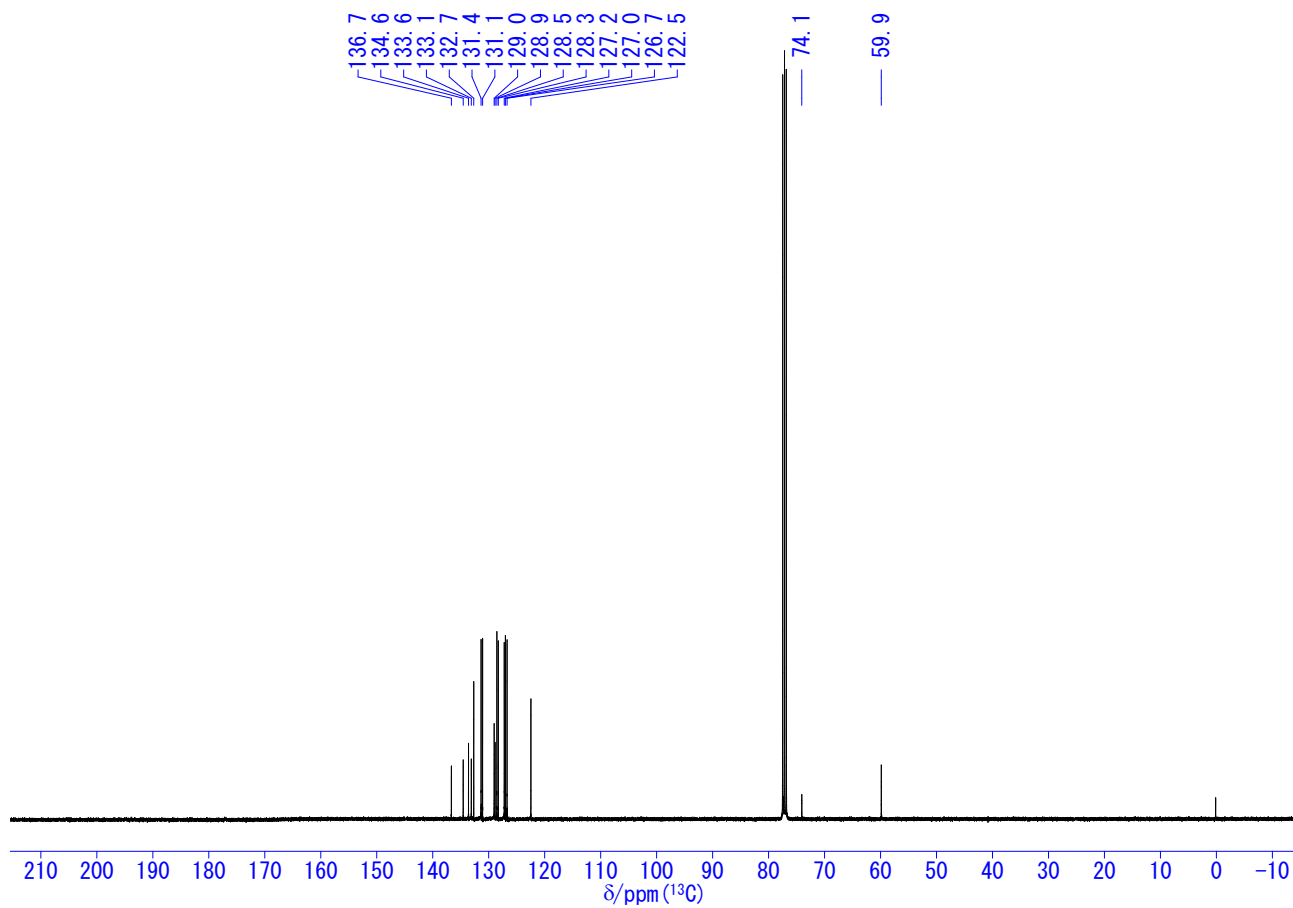

**Chart S19.**  $^{13}\text{C}$  NMR spectrum of **BNaph** in  $\text{CDCl}_3$ .

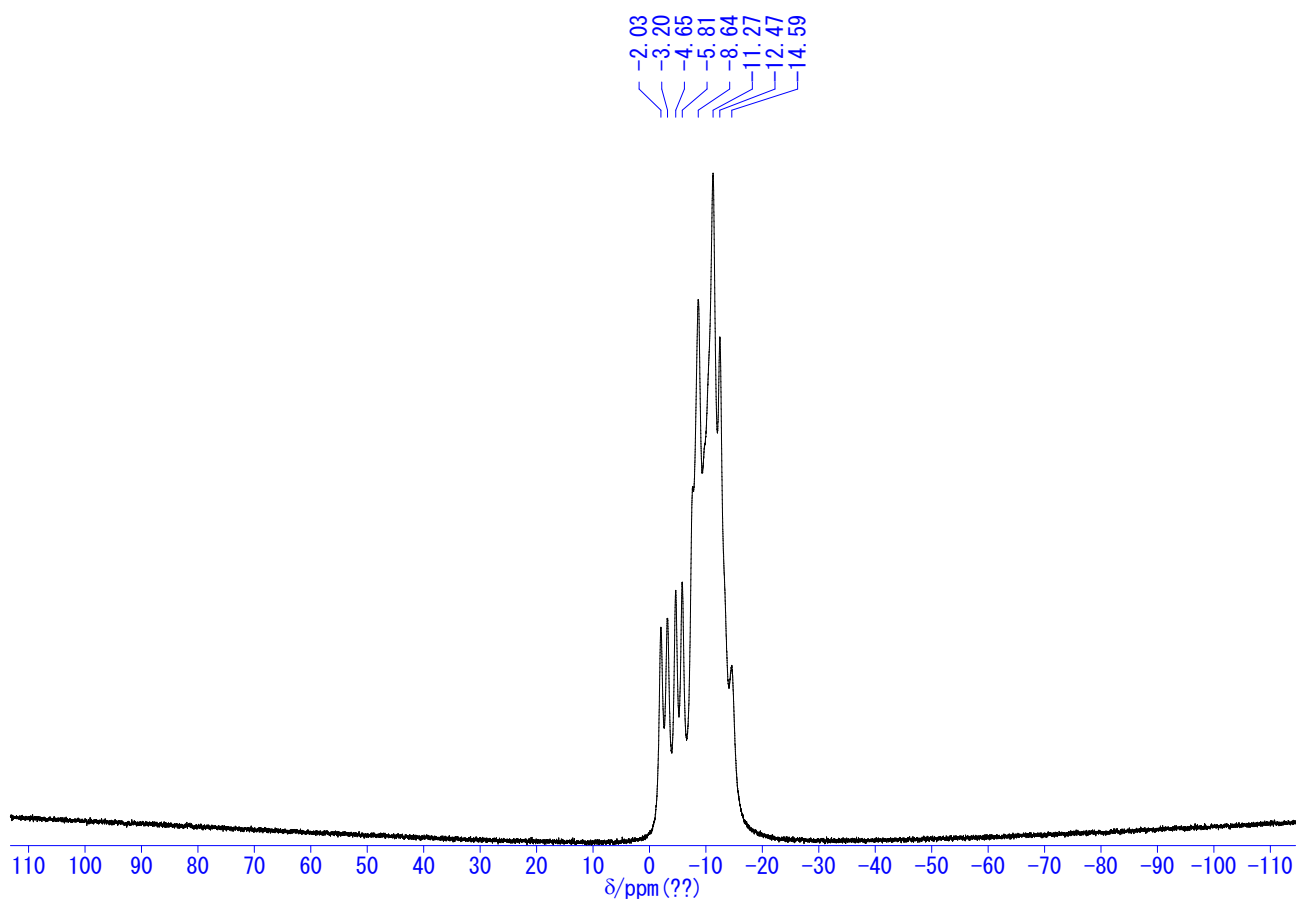

**Chart S20.**  $^{11}\text{B}$  NMR spectrum of **BNaph** in  $\text{CDCl}_3$ .

## Single Crystal X-ray Structures

X-ray crystallographic analyses were carried out by a Rigaku Saturn 724+ with MicroMax-007 HF CCD diffractometer with Varimax Mo optics using graphite-monochromated MoK $\alpha$  radiation. The structures were solved with SHELXT 2015<sup>2</sup> and refined on  $F^2$  with SHELXL 2015<sup>3</sup> on Olex 2-1.2.<sup>4</sup> All hydrogen atoms were placed at calculated positions and refined using a riding model. The program Mercury 4.2.0<sup>5</sup> was used to generate the X-ray structural diagram.

**Table S1.** Selected crystallographic data of the synthesized compounds

|                                                | <b>CNaph</b> (CCDC: 2236202)                                                                                                   | <b>BNaph</b> (CCDC: 2236203)                                                                                   |
|------------------------------------------------|--------------------------------------------------------------------------------------------------------------------------------|----------------------------------------------------------------------------------------------------------------|
| Empirical formula                              | C <sub>18</sub> H <sub>20</sub> B <sub>10</sub>                                                                                | C <sub>18</sub> H <sub>20</sub> B <sub>10</sub>                                                                |
| Formula weight                                 | 344.44                                                                                                                         | 344.44                                                                                                         |
| Temperature (K)                                | 143                                                                                                                            | 143                                                                                                            |
| Wavelength (Å)                                 | 0.71075                                                                                                                        | 0.71075                                                                                                        |
| Crystal system, space group                    | Triclinic, $P\bar{1}$                                                                                                          | Monoclinic, $P2_1/n$                                                                                           |
| Unit cell dimensions                           | $a = 10.227(5)$<br>$b = 13.290(8)$<br>$c = 14.005(7)$<br>$\alpha = 105.691(10)$<br>$\beta = 95.959(8)$<br>$\gamma = 90.075(9)$ | $a = 10.943(3)$<br>$b = 11.516(3)$<br>$c = 14.661(4)$<br>$\alpha = 90$<br>$\beta = 90.013(5)$<br>$\gamma = 90$ |
| $V$ (Å <sup>3</sup> )                          | 1821.8(17)                                                                                                                     | 1847.5(9)                                                                                                      |
| $Z$ , calculated density (Mg m <sup>-3</sup> ) | 4, 1.256                                                                                                                       | 4, 1.238                                                                                                       |
| Absorption coefficient                         | 0.063                                                                                                                          | 0.062                                                                                                          |
| $F(000)$                                       | 712                                                                                                                            | 712                                                                                                            |
| Crystal size (mm)                              | 0.04 × 0.04 × 0.02                                                                                                             | 0.09 × 0.06 × 0.02                                                                                             |
| $\theta$ range for data collection             | 3.024–27.520                                                                                                                   | 3.294–27.489                                                                                                   |
| Limiting indices                               | $-13 \leq h \leq 13,$<br>$-17 \leq k \leq 16,$<br>$-18 \leq l \leq 16$                                                         | $-13 \leq h \leq 12,$<br>$-11 \leq k \leq 14,$<br>$-19 \leq l \leq 19$                                         |
| Reflections collected (unique)                 | 8014/3799<br>[ $R(\text{int}) = 0.0757$ ]                                                                                      | 15060/3311<br>[ $R(\text{int}) = 0.0641$ ]                                                                     |
| Goodness-of-fit on $F^2$                       | 1.093                                                                                                                          | 1.080                                                                                                          |
| Final $R$ indices [ $I > 2\sigma(I)$ ]         | $R_1 = 0.1185, wR_2 = 0.2384$                                                                                                  | $R_1 = 0.0646, wR_2 = 0.1318$                                                                                  |
| $R$ indices (all data)                         | $R_1 = 0.2120, wR_2 = 0.2859$                                                                                                  | $R_1 = 0.0835, wR_2 = 0.1435$                                                                                  |



## Optical data

UV-vis absorption spectra were obtained on a SHIMADZU UV3600i Plus spectrophotometer. Photoluminescence (PL) spectra were measured with a HORIBA JOBIN YVON Fluorolog-3 spectrofluorometer. Because the second order signal of the LE band was overlapped to the ICT band, the LE and ICT regions were measured separately and merged afterwards. In addition, the ICT emission signals were weakened due to the sharp cut filter. Thus, the ICT signals should have been corrected by applying appropriate coefficients to connect with the LE signals smoothly. The PL lifetime measurement was performed on a Horiba FluoroCube spectrofluorometer system; excitation was carried out using a UV diode laser (NanoLED 292 nm). Temperature control in PL spectra and PL lifetime measurement was conducted by Oxford Optistat DN2. Fluorescence quantum yield (QY) was recorded on a HAMAMATSU Quantaaurus-QY Plus C13534-01 model.

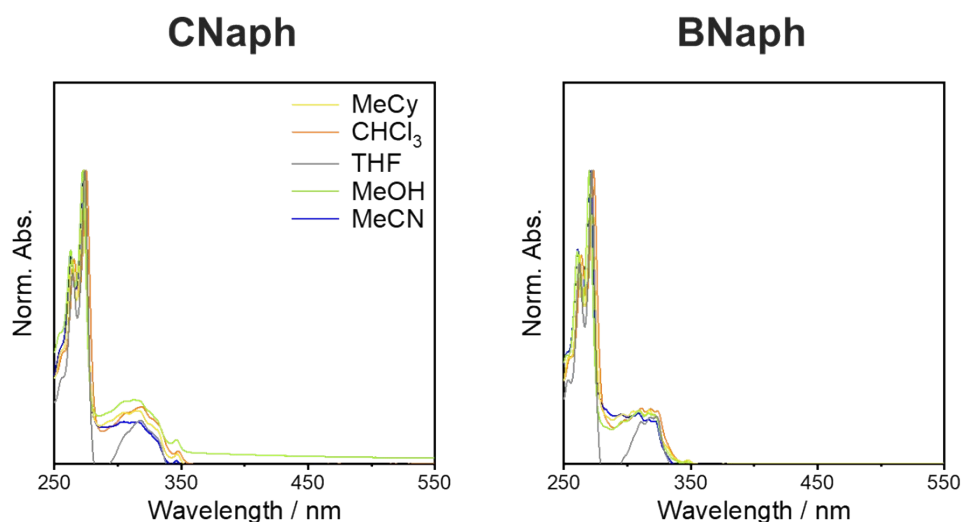

**Figure S1.** Absorption (abs.) spectra of **CNaph** (left) and **BNaph** (right) in various solvents.

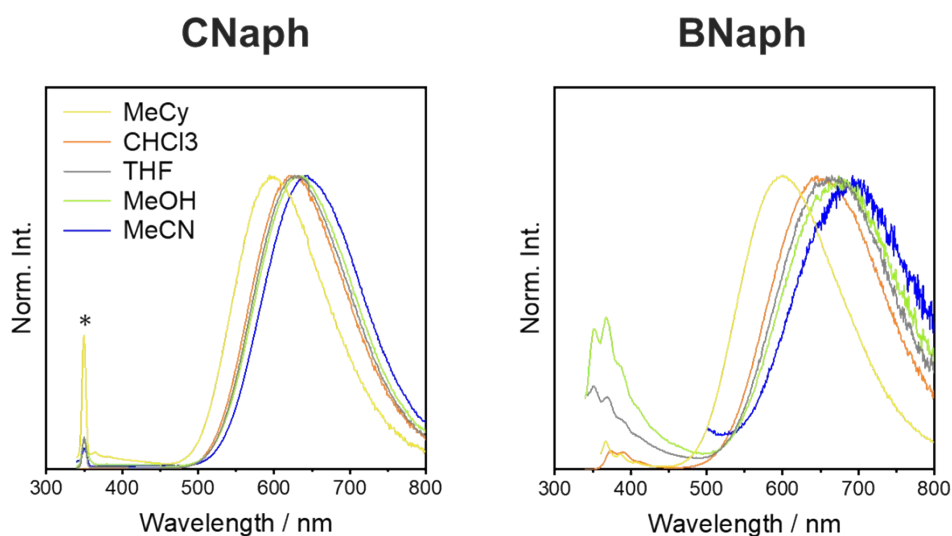

**Figure S2.** PL spectra of **CNaph** (left) and **BNaph** (right) in various solvents. An asterisk represents the scattering peak. The spectrum (< 500 nm) of **BNaph** in MeCN were omitted due to the noisy pattern.

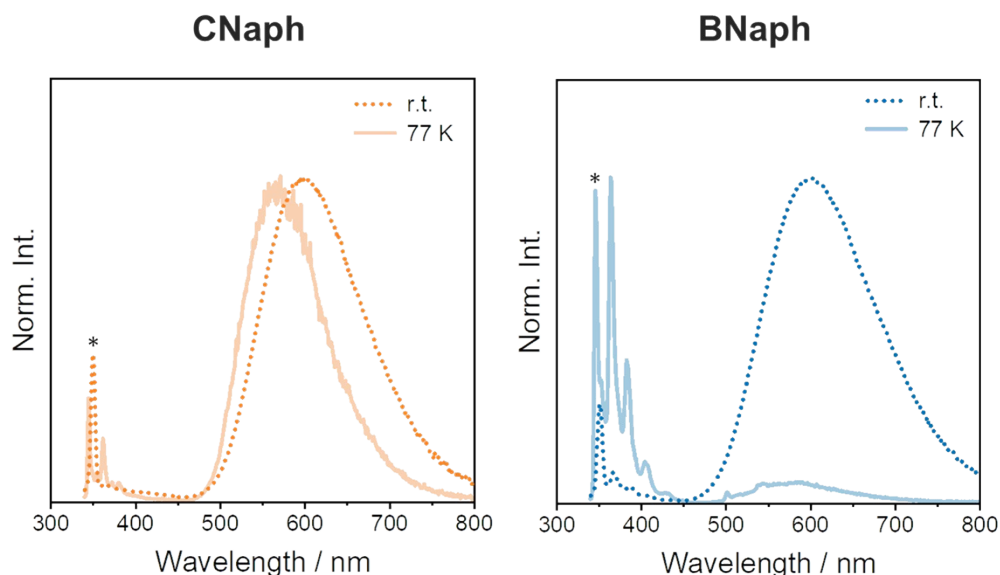

**Figure S3.** PL spectra of **CNaph** (left) and **BNaph** (right) in methylcyclohexane at r.t. (fluid state) and 77 K (glass matrix). An asterisk represents the scattering peak.

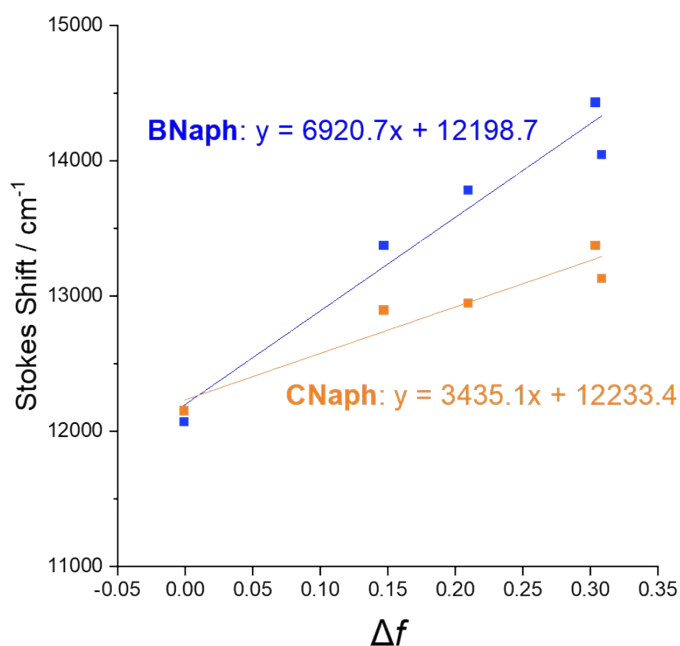

**Figure S4.** Lippert-Mataga plot of **CNaph** (orange) and **BNaph** (blue) in various solvents.

The differences in the dipole moments ( $\Delta\mu$ ) between the ground and excited states was estimated as follows:

$$(\text{slope}) = \frac{1}{4\pi\epsilon_0} \frac{2(\Delta\mu)^2}{hca^3}$$

where  $\epsilon_0$  is electric constant,  $h$  is Planck constant,  $c$  is velocity of light, and  $a$  is onsager cavity radius.

In this research,  $a$  was estimated by DFT calculation as described later.

## Computational methods

All calculations were performed using Gaussian 16 C01 package<sup>6</sup> at CAM-B3LYP/6-31+G(d,p) level of theory.

### One isolated molecule

The potential energy curve and optimized structure were calculated by the density functional theory (DFT) for  $S_0$  states and time dependent-DFT (TD-DFT) for  $S_1$  states. Because  $S_1$  structural optimization of **BNaph** from pristine  $S_0$  optimized structure was trapped by local minimum structure,  $C_{\text{cage}}-C_{\text{cage}}$  bond of  $S_0$  optimized structure was elongated to 2.0 Å and the structure was treated as an initial structure. The author performed the frequency calculation at the optimized structure to confirm that the structure was at the local minimum because no imaginary frequencies were found. The molecular radius was estimated by using the keyword “volume” for the optimized structure. Kohn-Sham orbitals (HOMO and LUMO) and natural transition orbitals (NTOs) were generated from the optimized structure using GaussView 6 (isovalue: 0.02).

### QM/MM analyses

The molecular coordination for QM/MM analyses was extracted from single-crystal structures. The central one molecule was treated by TD-DFT method at CAM-B3LYP/6-31+G(d,p) level of theory. The surrounding molecules were arranged to cover the central molecule completely and fixed in optimizing the structure of the central molecule.

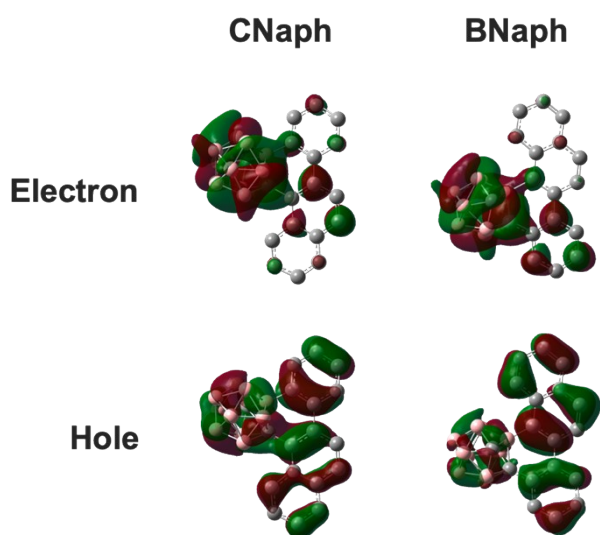

**Figure S5.** NTOs of **CNaph** and **BNaph** at  $S_1$ -optimized structures.

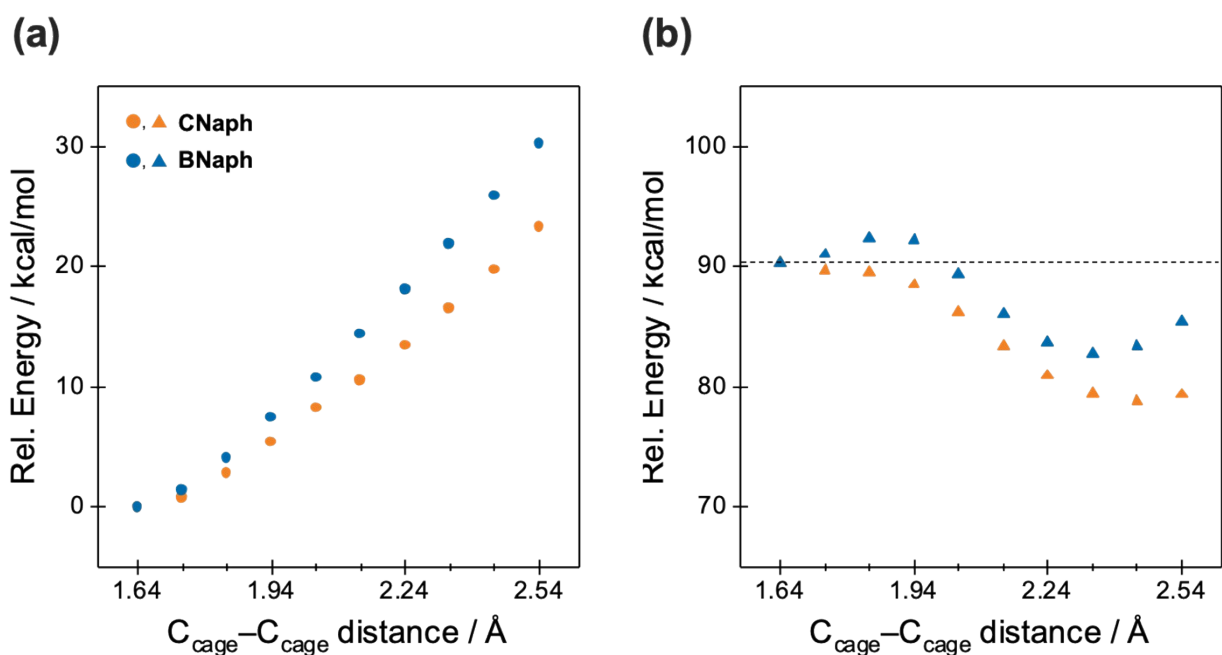

**Figure S6.** Enlarged energy levels at the (a)  $S_0$  and (b)  $S_1$  states of **CNaph** (orange) and **BNaph** (blue).

**Table S2.** Benchmark TD-DFT calculation for an isolated molecule.

| Compound     | geometry | condition <sup>a</sup> | transition energy (eV) | wavelength (nm) | $f$    | transition type |
|--------------|----------|------------------------|------------------------|-----------------|--------|-----------------|
| <b>CNaph</b> | $S_0$    | B3LYP                  | 3.7713                 | 328.76          | 0.1274 | LE              |
|              |          | PBE0-D3                | 3.8933                 | 318.45          | 0.1283 | LE              |
|              |          | CAM-B3LYP              | 4.2214                 | 293.70          | 0.1660 | LE              |
|              |          | M06-2X                 | 4.2463                 | 291.98          | 0.1746 | LE              |
|              | $S_1$    | B3LYP                  | 1.8664                 | 664.29          | 0.0523 | CT              |
|              |          | PBE0-D3                | 1.9888                 | 623.41          | 0.0567 | CT              |
|              |          | CAM-B3LYP              | 2.1105                 | 587.46          | 0.0590 | CT              |
|              |          | M06-2X                 | 3.5680                 | 347.49          | 0.2205 | LE <sup>b</sup> |
| <b>BNaph</b> | $S_0$    | B3LYP                  | 3.7213                 | 333.17          | 0.0862 | LE              |
|              |          | PBE0-D3                | 3.8536                 | 321.74          | 0.0964 | LE              |
|              |          | CAM-B3LYP              | 4.2008                 | 295.14          | 0.1231 | LE              |
|              |          | M06-2X                 | 4.2142                 | 294.20          | 0.1195 | LE              |
|              | $S_1$    | B3LYP                  | 1.6265                 | 762.26          | 0.0190 | CT              |
|              |          | PBE0-D3                | 1.7862                 | 694.12          | 0.0224 | CT              |
|              |          | CAM-B3LYP              | 2.2092                 | 561.21          | 0.0285 | CT              |
|              |          | M06-2X                 | 3.6399                 | 340.62          | 0.2198 | LE <sup>b</sup> |

<sup>a</sup> 6-31G+(d,p) basis set was used in all conditions.

<sup>b</sup> trapped by the local minimum when using the standard initial structures (as mentioned above).

**Table S3.** Optimized geometry of **CNaph** in the  $S_0$  state

| Center Number | Atomic Number | Coordinates (Angstroms) |           |           |
|---------------|---------------|-------------------------|-----------|-----------|
|               |               | x                       | y         | z         |
| 1             | 6             | 0.355136                | 1.631741  | 0.03696   |
| 2             | 6             | 3.167656                | 1.244737  | 0.102437  |
| 3             | 6             | 0.860891                | 0.325616  | -0.020939 |
| 4             | 6             | -0.100196               | -0.855556 | 0.035723  |
| 5             | 6             | -2.111154               | 1.077445  | 0.144511  |
| 6             | 6             | -1.140592               | -1.132637 | -1.21861  |
| 7             | 1             | -1.029067               | -0.454339 | -2.054373 |
| 8             | 6             | -1.460739               | 3.352062  | -0.281585 |
| 9             | 1             | -0.717308               | 4.103964  | -0.509098 |
| 10            | 6             | 2.301456                | 0.119951  | -0.039809 |
| 11            | 6             | -3.44746                | 1.488505  | 0.166295  |
| 12            | 1             | -4.223972               | 0.746582  | 0.322818  |
| 13            | 6             | 2.959042                | -1.132802 | -0.211106 |
| 14            | 1             | 2.395851                | -2.034452 | -0.349353 |
| 15            | 6             | -2.790073               | 3.745643  | -0.275862 |
| 16            | 1             | -3.039659               | 4.783394  | -0.472585 |
| 17            | 6             | -1.087885               | 2.018683  | -0.033957 |
| 18            | 6             | 4.577091                | 1.095782  | 0.09991   |
| 19            | 1             | 5.184217                | 1.987735  | 0.222453  |
| 20            | 6             | 1.268716                | 2.710997  | 0.212181  |
| 21            | 1             | 0.881647                | 3.70796   | 0.359301  |
| 22            | 6             | 2.612063                | 2.53202   | 0.25804   |
| 23            | 1             | 3.273805                | 3.378304  | 0.415565  |
| 24            | 6             | -3.795386               | 2.81664   | -0.024398 |
| 25            | 1             | -4.836666               | 3.121123  | -0.003577 |
| 26            | 6             | 4.325801                | -1.252699 | -0.223964 |
| 27            | 1             | 4.764399                | -2.235236 | -0.365291 |
| 28            | 6             | 5.159357                | -0.130432 | -0.058877 |
| 29            | 1             | 6.238658                | -0.239305 | -0.06396  |
| 30            | 5             | -1.523567               | -2.765949 | -1.438668 |
| 31            | 1             | -1.679437               | -3.145794 | -2.547206 |
| 32            | 5             | 0.241137                | -2.366464 | 0.783322  |
| 33            | 1             | 1.285789                | -2.530498 | 1.298516  |
| 34            | 5             | -1.295742               | -2.970546 | 1.401282  |
| 35            | 1             | -1.317977               | -3.637393 | 2.380475  |
| 36            | 5             | -2.668339               | -1.638878 | -0.71361  |
| 37            | 1             | -3.602987               | -1.256319 | -1.327983 |
| 38            | 5             | -2.389984               | -3.213373 | 0.032093  |
| 39            | 1             | -3.221903               | -4.056588 | 0.010645  |
| 40            | 5             | -0.905723               | -1.251683 | 1.511464  |
| 41            | 1             | -0.604561               | -0.619555 | 2.46304   |
| 42            | 5             | 0.099353                | -2.242763 | -0.990283 |
| 43            | 1             | 0.977734                | -2.241245 | -1.772144 |
| 44            | 5             | -0.650665               | -3.583923 | -0.139444 |
| 45            | 1             | -0.223414               | -4.68033  | -0.27545  |
| 46            | 5             | -1.75952                | -0.42709  | 0.211414  |
| 47            | 5             | -2.53901                | -1.758499 | 1.046002  |
| 48            | 1             | -3.467179               | -1.53635  | 1.748647  |

**Table S4.** Optimized geometry of **CNaph** in the  $S_1$  state

| Center Number | Atomic Number | Coordinates (Angstroms) |            |            |
|---------------|---------------|-------------------------|------------|------------|
|               |               | x                       | y          | z          |
| 1             | 6             | 0.5889176               | 1.6341075  | 0.0941202  |
| 2             | 6             | 3.3515678               | 0.9553065  | 0.0077386  |
| 3             | 6             | 0.968599                | 0.2540181  | 0.084104   |
| 4             | 6             | -0.0687522              | -0.7713871 | 0.2232078  |
| 5             | 6             | -1.8759178              | 1.1997348  | -0.2270328 |
| 6             | 6             | -1.6591085              | -1.3269266 | -1.5324267 |
| 7             | 1             | -1.6379145              | -0.889702  | -2.5220654 |
| 8             | 6             | -1.1126098              | 3.4537442  | 0.3149772  |
| 9             | 1             | -0.3550441              | 4.1416549  | 0.6628745  |
| 10            | 6             | 2.3704457               | -0.079685  | -0.0104764 |
| 11            | 6             | -3.1522355              | 1.7426524  | -0.4812377 |
| 12            | 1             | -3.9560688              | 1.0686806  | -0.7528994 |
| 13            | 6             | 2.8496681               | -1.4092567 | -0.163728  |
| 14            | 1             | 2.1569174               | -2.2281569 | -0.2345084 |
| 15            | 6             | -2.3812981              | 3.9394312  | 0.1140171  |
| 16            | 1             | -2.5899805              | 4.9886734  | 0.2956373  |
| 17            | 6             | -0.7986396              | 2.0879289  | 0.0900974  |
| 18            | 6             | 4.721458                | 0.64297    | -0.0727249 |
| 19            | 1             | 5.4407956               | 1.4559717  | -0.0505817 |
| 20            | 6             | 1.614371                | 2.6262432  | 0.0840791  |
| 21            | 1             | 1.3424696               | 3.6708951  | 0.0587858  |
| 22            | 6             | 2.9334425               | 2.3115348  | 0.0673448  |
| 23            | 1             | 3.6851392               | 3.0945408  | 0.0607699  |
| 24            | 6             | -3.4108586              | 3.083544   | -0.3245169 |
| 25            | 1             | -4.4085885              | 3.4746917  | -0.4943357 |
| 26            | 6             | 4.1944329               | -1.6908689 | -0.2506793 |
| 27            | 1             | 4.51462                 | -2.7203373 | -0.3699961 |
| 28            | 6             | 5.14571                 | -0.6617146 | -0.1919695 |
| 29            | 1             | 6.2044916               | -0.8905431 | -0.2544505 |
| 30            | 5             | -2.021911               | -2.861225  | -1.2560973 |
| 31            | 1             | -2.2438914              | -3.5735101 | -2.1766096 |
| 32            | 5             | -0.0056979              | -2.256363  | 0.8981386  |
| 33            | 1             | 1.0042948               | -2.6144855 | 1.3943242  |
| 34            | 5             | -1.6109096              | -2.5673646 | 1.6173613  |
| 35            | 1             | -1.6904929              | -3.0651677 | 2.6919694  |
| 36            | 5             | -3.0264017              | -1.5193801 | -0.6621357 |
| 37            | 1             | -4.0435656              | -1.1556853 | -1.151393  |
| 38            | 5             | -2.7616696              | -2.9564424 | 0.3460177  |
| 39            | 1             | -3.6416338              | -3.7252922 | 0.5508416  |
| 40            | 5             | -1.0220725              | -0.9105881 | 1.517229   |
| 41            | 1             | -0.8154869              | -0.1772473 | 2.4241625  |
| 42            | 5             | -0.3145699              | -2.0996683 | -0.9232655 |
| 43            | 1             | 0.5742893               | -2.3115293 | -1.6774702 |
| 44            | 5             | -1.0590015              | -3.4249053 | 0.1430814  |
| 45            | 1             | -0.704053               | -4.556586  | 0.1611685  |
| 46            | 5             | -1.6546744              | -0.331516  | -0.1760598 |
| 47            | 5             | -2.7131245              | -1.2981851 | 1.0408786  |
| 48            | 1             | -3.5612894              | -0.8069359 | 1.7086716  |

**Table S5.** Optimized geometry of **BNaph** in the  $S_0$  state

| Center Number | Atomic Number | Coordinates (Angstroms) |            |            |
|---------------|---------------|-------------------------|------------|------------|
|               |               | x                       | y          | z          |
| 1             | 6             | -2.4082166              | -0.0472114 | -0.0965381 |
| 2             | 6             | -3.3732242              | 0.9774219  | 0.1129447  |
| 3             | 6             | 1.72665                 | -0.3176378 | -0.0333943 |
| 4             | 6             | -1.0002319              | 0.2716655  | -0.0918185 |
| 5             | 6             | 3.2227997               | 1.6615437  | -0.0662971 |
| 6             | 1             | 4.0511949               | 0.9654641  | -0.0440905 |
| 7             | 6             | 3.4801186               | 3.0190028  | -0.1496039 |
| 8             | 1             | 4.5026362               | 3.3789501  | -0.1828728 |
| 9             | 6             | -2.9232953              | 2.2990099  | 0.338031   |
| 10            | 1             | -3.6527522              | 3.0774127  | 0.5420963  |
| 11            | 6             | 1.0714323               | -1.0437891 | 1.269081   |
| 12            | 1             | 0.8054438               | -0.3791606 | 2.0806406  |
| 13            | 6             | 1.916326                | 1.1674151  | -0.0233726 |
| 14            | 6             | -4.7574072              | 0.6749573  | 0.1108706  |
| 15            | 1             | -5.4637274              | 1.4829437  | 0.2785401  |
| 16            | 6             | -2.9082468              | -1.3609808 | -0.3146777 |
| 17            | 1             | -2.2215206              | -2.1712642 | -0.4975112 |
| 18            | 6             | -0.6059788              | 1.601024   | 0.0547017  |
| 19            | 6             | 0.8172137               | 2.0481419  | -0.0331227 |
| 20            | 6             | -4.2534189              | -1.6298314 | -0.3210826 |
| 21            | 1             | -4.5932143              | -2.6451409 | -0.4986594 |
| 22            | 6             | -1.5964961              | 2.5970002  | 0.3041344  |
| 23            | 1             | -1.3025145              | 3.6171093  | 0.5055078  |
| 24            | 6             | 1.1117978               | 3.4180164  | -0.1536154 |
| 25            | 1             | 0.3086798               | 4.1363984  | -0.2324541 |
| 26            | 6             | 2.4082351               | 3.9009392  | -0.2103748 |
| 27            | 1             | 2.5773828               | 4.9683659  | -0.3074195 |
| 28            | 5             | 1.2700387               | -1.131826  | -1.4615053 |
| 29            | 1             | 1.1487764               | -0.4785018 | -2.4385262 |
| 30            | 5             | 0.2364496               | -2.4509093 | -0.9172002 |
| 31            | 1             | -0.6341372              | -2.8654393 | -1.6021924 |
| 32            | 5             | 1.2051995               | -3.5122161 | 0.131108   |
| 33            | 1             | 0.9946158               | -4.6755655 | 0.2072037  |
| 34            | 6             | -5.1966731              | -0.6040956 | -0.102243  |
| 35            | 1             | -6.2581268              | -0.8294361 | -0.1065948 |
| 36            | 5             | 2.7326707               | -1.263433  | 1.0089985  |
| 37            | 1             | 3.4819854               | -0.6803765 | 1.7077303  |
| 38            | 5             | 0.0940113               | -2.3406544 | 0.8487426  |
| 39            | 1             | -0.8644036              | -2.5505261 | 1.5060626  |
| 40            | 5             | 1.6995164               | -2.587022  | 1.5501716  |
| 41            | 1             | 1.8001675               | -2.9415557 | 2.6733404  |
| 42            | 5             | 1.9423279               | -2.7578333 | -1.2920406 |
| 43            | 1             | 2.2702841               | -3.3682052 | -2.25309   |
| 44            | 5             | 2.8723638               | -1.3629306 | -0.7507983 |
| 45            | 1             | 3.8148067               | -0.8844126 | -1.276194  |
| 46            | 5             | 0.0982049               | -0.8550543 | -0.1512678 |
| 47            | 5             | 2.8528658               | -2.8310771 | 0.2336284  |
| 48            | 1             | 3.8278763               | -3.4878296 | 0.377562   |

**Table S6.** Optimized geometry of **BNaph** in the  $S_1(\text{LE})$  state

| Center Number | Atomic Number | Coordinates (Angstroms) |            |            |
|---------------|---------------|-------------------------|------------|------------|
|               |               | x                       | y          | z          |
| 1             | 6             | -2.3950299              | -0.0464904 | -0.0844882 |
| 2             | 6             | -3.3715927              | 0.9940765  | 0.094721   |
| 3             | 6             | 1.7169489               | -0.3254209 | -0.0603225 |
| 4             | 6             | -1.00959                | 0.2454505  | -0.061373  |
| 5             | 6             | 3.2232957               | 1.641233   | -0.0760362 |
| 6             | 1             | 4.0456496               | 0.9369191  | -0.061672  |
| 7             | 6             | 3.503959                | 2.9965356  | -0.1325546 |
| 8             | 1             | 4.5313886               | 3.3416127  | -0.1588574 |
| 9             | 6             | -2.903861               | 2.3248958  | 0.328808   |
| 10            | 1             | -3.6320127              | 3.1062769  | 0.5252141  |
| 11            | 6             | 1.1026319               | -1.0551951 | 1.281852   |
| 12            | 1             | 0.8666752               | -0.3816432 | 2.0952673  |
| 13            | 6             | 1.9169274               | 1.1539162  | -0.0536162 |
| 14            | 6             | -4.7315                 | 0.7096831  | 0.0775546  |
| 15            | 1             | -5.4357615              | 1.5229598  | 0.2286809  |
| 16            | 6             | -2.9199517              | -1.3586995 | -0.2684246 |
| 17            | 1             | -2.2446225              | -2.1861947 | -0.4154851 |
| 18            | 6             | -0.5703912              | 1.6558308  | 0.0583122  |
| 19            | 6             | 0.8042977               | 2.0623829  | -0.0474793 |
| 20            | 6             | -4.2915138              | -1.6203157 | -0.2894829 |
| 21            | 1             | -4.6274155              | -2.6407166 | -0.4420869 |
| 22            | 6             | -1.56956                | 2.6254586  | 0.3094773  |
| 23            | 1             | -1.2854922              | 3.6481133  | 0.5164221  |
| 24            | 6             | 1.1395173               | 3.4485282  | -0.1509596 |
| 25            | 1             | 0.3485811               | 4.1799068  | -0.2422532 |
| 26            | 6             | 2.4350166               | 3.9028855  | -0.1868627 |
| 27            | 1             | 2.6250313               | 4.9678129  | -0.2744832 |
| 28            | 5             | 1.2130914               | -1.150072  | -1.4618956 |
| 29            | 1             | 1.0571407               | -0.5060744 | -2.4397999 |
| 30            | 5             | 0.1947181               | -2.4666499 | -0.8760216 |
| 31            | 1             | -0.6990023              | -2.8780507 | -1.5339966 |
| 32            | 5             | 1.1936256               | -3.5255725 | 0.1435935  |
| 33            | 1             | 0.9831695               | -4.688398  | 0.2303326  |
| 34            | 6             | -5.2116266              | -0.5992004 | -0.1203805 |
| 35            | 1             | -6.2775631              | -0.7964568 | -0.1342067 |
| 36            | 5             | 2.7500429               | -1.2727989 | 0.9601516  |
| 37            | 1             | 3.5267757               | -0.6972033 | 1.6338845  |
| 38            | 5             | 0.1061224               | -2.3470288 | 0.8905597  |
| 39            | 1             | -0.8392707              | -2.5502483 | 1.5710769  |
| 40            | 5             | 1.7332012               | -2.5953042 | 1.5445389  |
| 41            | 1             | 1.8743207               | -2.9519806 | 2.6628848  |
| 42            | 5             | 1.8859016               | -2.7787446 | -1.3067159 |
| 43            | 1             | 2.1792913               | -3.3971991 | -2.2739723 |
| 44            | 5             | 2.8372405               | -1.381524  | -0.8014524 |
| 45            | 1             | 3.7656618               | -0.9096743 | -1.3571129 |
| 46            | 5             | 0.0850491               | -0.8650883 | -0.1122013 |
| 47            | 5             | 2.8428857               | -2.8466923 | 0.1898832  |
| 48            | 1             | 3.8201962               | -3.5057121 | 0.3054946  |



**Table S7.** Optimized geometry of **BNaph** in the  $S_1(\text{ICT})$  state

| Center Number | Atomic Number | Coordinates (Angstroms) |            |            |
|---------------|---------------|-------------------------|------------|------------|
|               |               | x                       | y          | z          |
| 1             | 6             | -2.3382445              | 0.0382751  | 0.0913521  |
| 2             | 6             | -3.2662035              | 1.1022885  | -0.1156649 |
| 3             | 6             | 1.7300165               | -0.2595216 | -0.3021192 |
| 4             | 6             | -0.9153974              | 0.2778844  | 0.0722475  |
| 5             | 6             | 3.300586                | 1.6425262  | -0.0884995 |
| 6             | 1             | 4.1152669               | 0.9460516  | -0.2433563 |
| 7             | 6             | 3.5684775               | 2.9742205  | 0.1676704  |
| 8             | 1             | 4.5969712               | 3.3181617  | 0.2085527  |
| 9             | 6             | -2.7716467              | 2.4105325  | -0.3768937 |
| 10            | 1             | -3.4795741              | 3.2050117  | -0.5933896 |
| 11            | 6             | 0.9307652               | -1.4865643 | 1.5322539  |
| 12            | 1             | 0.7058799               | -1.072374  | 2.5062847  |
| 13            | 6             | 1.9856407               | 1.1565586  | -0.13024   |
| 14            | 6             | -4.6464825              | 0.8658494  | -0.1092914 |
| 15            | 1             | -5.3214771              | 1.6993724  | -0.2783343 |
| 16            | 6             | -2.8917544              | -1.2507904 | 0.2773485  |
| 17            | 1             | -2.2383544              | -2.0921806 | 0.4181119  |
| 18            | 6             | -0.4826683              | 1.6495245  | -0.0852075 |
| 19            | 6             | 0.9096957               | 2.0674972  | 0.04762    |
| 20            | 6             | -4.2598246              | -1.4671272 | 0.288269   |
| 21            | 1             | -4.6350601              | -2.4731973 | 0.4407266  |
| 22            | 6             | -1.4368697              | 2.6646116  | -0.3690491 |
| 23            | 1             | -1.0951074              | 3.6619502  | -0.6069017 |
| 24            | 6             | 1.2170086               | 3.4165914  | 0.3381434  |
| 25            | 1             | 0.4192768               | 4.1139219  | 0.5595878  |
| 26            | 6             | 2.5176979               | 3.8690779  | 0.4034938  |
| 27            | 1             | 2.7211923               | 4.9060765  | 0.6466267  |
| 28            | 5             | 1.0549413               | -1.0317947 | -1.543862  |
| 29            | 1             | 0.7590031               | -0.3945904 | -2.4994252 |
| 30            | 5             | 0.0346073               | -2.3646925 | -0.9440759 |
| 31            | 1             | -0.9394012              | -2.6085444 | -1.5790075 |
| 32            | 5             | 1.0794003               | -3.6097918 | -0.1815119 |
| 33            | 1             | 0.8746281               | -4.7743309 | -0.2854329 |
| 34            | 6             | -5.1481207              | -0.4089581 | 0.0995514  |
| 35            | 1             | -6.2191257              | -0.5809512 | 0.1062833  |
| 36            | 5             | 2.472228                | -1.3416113 | 0.8824671  |
| 37            | 1             | 3.3311037               | -0.87367   | 1.5530636  |
| 38            | 5             | 0.0073053               | -2.6054338 | 0.7981991  |
| 39            | 1             | -0.945726               | -2.9932006 | 1.3856351  |
| 40            | 5             | 1.6496666               | -2.9293863 | 1.3486467  |
| 41            | 1             | 1.9331493               | -3.5352198 | 2.3274868  |
| 42            | 5             | 1.6854749               | -2.6837946 | -1.5402431 |
| 43            | 1             | 1.9128022               | -3.2023215 | -2.5837336 |
| 44            | 5             | 2.7245171               | -1.3619726 | -0.9399977 |
| 45            | 1             | 3.7154868               | -0.9667557 | -1.4579885 |
| 46            | 5             | 0.205359                | -0.8536386 | 0.1200776  |
| 47            | 5             | 2.702373                | -2.8825921 | -0.0769951 |
| 48            | 1             | 3.6936471               | -3.5345244 | -0.0842231 |

**Table S8.** Result of TD-DFT calculation for **CNaph** in the  $S_0$  geometry

| Excited State | Energy / eV | Wavelength / nm | $f$    | Composition       | Coefficient |
|---------------|-------------|-----------------|--------|-------------------|-------------|
| 1             | 4.2214      | 293.70          | 0.1660 | HOMO-1 -> LUMO+1  | -0.17046    |
|               |             |                 |        | HOMO -> LUMO      | 0.67197     |
| 2             | 4.3134      | 287.44          | 0.0255 | HOMO-3 -> LUMO    | -0.12242    |
|               |             |                 |        | HOMO-1 -> LUMO    | 0.53686     |
|               |             |                 |        | HOMO -> LUMO+1    | 0.38262     |
| 3             | 4.8947      | 253.30          | 0.0843 | HOMO-3 -> LUMO+2  | 0.13694     |
|               |             |                 |        | HOMO-2 -> LUMO    | 0.46303     |
|               |             |                 |        | HOMO-2 -> LUMO+1  | 0.17750     |
|               |             |                 |        | HOMO-2 -> LUMO+11 | 0.10012     |
|               |             |                 |        | HOMO-1 -> LUMO    | 0.16912     |
|               |             |                 |        | HOMO-1 -> LUMO+2  | 0.18828     |
|               |             |                 |        | HOMO -> LUMO+1    | -0.20600    |
|               |             |                 |        | HOMO -> LUMO+2    | -0.26186    |

**Table S9.** Result of TD-DFT calculation for **CNaph** in the  $S_1$  geometry

| Excited State | Energy / eV | Wavelength / nm | $f$    | Composition    | Coefficient |
|---------------|-------------|-----------------|--------|----------------|-------------|
| 1             | 2.1105      | 587.46          | 0.0590 | HOMO-4 -> LUMO | -0.10932    |
|               |             |                 |        | HOMO-2 -> LUMO | 0.18859     |
|               |             |                 |        | HOMO -> LUMO   | -0.65304    |
| 2             | 3.0040      | 412.73          | 0.0880 | HOMO-6 -> LUMO | 0.13818     |
|               |             |                 |        | HOMO-4 -> LUMO | 0.24780     |
|               |             |                 |        | HOMO-2 -> LUMO | -0.50292    |
|               |             |                 |        | HOMO-1 -> LUMO | 0.29142     |
|               |             |                 |        | HOMO -> LUMO   | -0.24564    |
| 3             | 3.2961      | 376.16          | 0.1396 | HOMO-4 -> LUMO | -0.12064    |
|               |             |                 |        | HOMO-2 -> LUMO | 0.26993     |
|               |             |                 |        | HOMO-1 -> LUMO | 0.62111     |

**Table S10.** Result of TD-DFT calculation for **BNaph** in the  $S_0$  geometry

| Excited State | Energy / eV | Wavelength / nm | $f$    | Composition      | Coefficient |
|---------------|-------------|-----------------|--------|------------------|-------------|
| 1             | 4.2008      | 295.14          | 0.1231 | HOMO-1 -> LUMO   | -0.10455    |
|               |             |                 |        | HOMO-1 -> LUMO+1 | 0.17198     |
|               |             |                 |        | HOMO -> LUMO     | 0.65467     |
| 2             | 4.3413      | 285.59          | 0.0458 | HOMO-1 -> LUMO   | 0.49631     |
|               |             |                 |        | HOMO -> LUMO     | 0.15840     |
|               |             |                 |        | HOMO -> LUMO+1   | -0.41343    |
| 3             | 4.9247      | 251.76          | 0.1122 | HOMO-3 -> LUMO   | -0.12682    |
|               |             |                 |        | HOMO-3 -> LUMO+2 | 0.16187     |
|               |             |                 |        | HOMO-2 -> LUMO   | -0.31692    |
|               |             |                 |        | HOMO-2 -> LUMO+1 | -0.15139    |
|               |             |                 |        | HOMO-1 -> LUMO   | -0.11632    |
|               |             |                 |        | HOMO-1 -> LUMO+1 | 0.14641     |
|               |             |                 |        | HOMO-1 -> LUMO+2 | 0.22063     |
|               |             |                 |        | HOMO -> LUMO+2   | 0.44839     |

**Table S11.** Result of TD-DFT calculation for **BNaph** in the  $S_1$ (LE) geometry

| Excited State | Energy / eV | Wavelength / nm | $f$    | Composition      | Coefficient |
|---------------|-------------|-----------------|--------|------------------|-------------|
| 1             | 3.6170      | 342.78          | 0.2227 | HOMO-1 -> LUMO+1 | 0.12320     |
|               |             |                 |        | HOMO -> LUMO     | 0.68853     |
| 2             | 4.0526      | 305.94          | 0.0255 | HOMO-1 -> LUMO   | 0.51931     |
|               |             |                 |        | HOMO -> LUMO+1   | -0.41646    |
| 3             | 4.6587      | 266.14          | 0.6394 | HOMO-3 -> LUMO   | -0.15762    |
|               |             |                 |        | HOMO-2 -> LUMO   | -0.10305    |
|               |             |                 |        | HOMO-1 -> LUMO   | -0.37960    |
|               |             |                 |        | HOMO -> LUMO+1   | -0.46443    |
|               |             |                 |        | HOMO -> LUMO+2   | 0.25774     |

**Table S12.** Result of TD-DFT calculation for **BNaph** in the  $S_1$ (ICT) geometry

| Excited State | Energy / eV | Wavelength / nm | $f$    | Composition    | Coefficient |
|---------------|-------------|-----------------|--------|----------------|-------------|
| 1             | 2.2092      | 561.21          | 0.0285 | HOMO-2 -> LUMO | 0.13135     |
|               |             |                 |        | HOMO -> LUMO   | 0.67670     |
| 2             | 3.3897      | 365.76          | 0.0445 | HOMO-2 -> LUMO | 0.14682     |
|               |             |                 |        | HOMO-1 -> LUMO | 0.66040     |
|               |             |                 |        | HOMO -> LUMO   | -0.11110    |
| 3             | 3.4486      | 359.53          | 0.0246 | HOMO-6 -> LUMO | 0.15296     |
|               |             |                 |        | HOMO-5 -> LUMO | -0.26122    |
|               |             |                 |        | HOMO-4 -> LUMO | 0.33279     |
|               |             |                 |        | HOMO-3 -> LUMO | 0.17892     |
|               |             |                 |        | HOMO-2 -> LUMO | 0.46081     |
|               |             |                 |        | HOMO-1 -> LUMO | -0.12391    |
|               |             |                 |        | HOMO -> LUMO   | -0.13307    |

**Table S13.** Results of QM/MM calculation for the  $S_1$ - $S_0$  transitions of **CNaph**

| Condition             | Energy / eV | Wavelength / nm | $f$    | Composition    | Coefficient |
|-----------------------|-------------|-----------------|--------|----------------|-------------|
| isolated one molecule | 2.1105      | 587.46          | 0.0590 | HOMO-4 -> LUMO | -0.10932    |
|                       |             |                 |        | HOMO-2 -> LUMO | 0.18859     |
|                       |             |                 |        | HOMO -> LUMO   | -0.65304    |
| QM/MM                 | 2.5541      | 485.43          | 0.1078 | HOMO-2 -> LUMO | -0.12656    |
|                       |             |                 |        | HOMO -> LUMO   | -0.68011    |

**Table S14.** Results of QM/MM calculation for the  $S_1$ - $S_0$  transitions of **BNaph**

| Condition             | Energy / eV | Wavelength / nm | $f$    | Composition    | Coefficient |
|-----------------------|-------------|-----------------|--------|----------------|-------------|
| isolated one molecule | 2.2092      | 561.21          | 0.0285 | HOMO-2 -> LUMO | 0.13135     |
|                       |             |                 |        | HOMO -> LUMO   | 0.67670     |
| QM/MM                 | 2.4592      | 504.16          | 0.0425 | HOMO-2 -> LUMO | -0.12692    |
|                       |             |                 |        | HOMO -> LUMO   | -0.67702    |

## References

- (1) L. J. P. van der Boon, L. van Gelderen, T. R. de Groot, M. Lutz, J. C. Slootweg, A. W. Ehlers and K. Lammertsma, *Inorg. Chem.*, **2018**, *57*, 12697–12708.
- (2) Sheldrick, G. M. *Acta Crystallogr. Sect. A Found. Crystallogr.* **2015**, *71*, 3–8.
- (3) Sheldrick, G. M. *Acta Crystallogr. Sect. C Struct. Chem.* **2015**, *71*, 3–8.
- (4) Dolomanov, O. V.; Bourhis, L. J. Gildea, R. J.; Howard, J. A. K.; Puschmann, H. *J. Appl. Cryst.* **2009**, *42*, 339–341.
- (5) C. F. Macrae, P. R. Edgington, P. McCabe, E. Pidcock, G. P. Shields, R. Taylor, M. Towler, J. van de Streek. *J. Appl. Cryst.* **2006**, *39*, 453–457.
- (6) Gaussian 16, Revision C.01, M. J. Frisch, G. W. Trucks, H. B. Schlegel, G. E. Scuseria, M. A. Robb, J. R. Cheeseman, G. Scalmani, V. Barone, G. A. Petersson, H. Nakatsuji, X. Li, M. Caricato, A. V. Marenich, J. Bloino, B. G. Janesko, R. Gomperts, B. Mennucci, H. P. Hratchian, J. V. Ortiz, A. F. Izmaylov, J. L. Sonnenberg, D. Williams-Young, F. Ding, F. Lipparini, F. Egidi, J. Goings, B. Peng, A. Petrone, T. Henderson, D. Ranasinghe, V. G. Zakrzewski, J. Gao, N. Rega, G. Zheng, W. Liang, M. Hada, M. Ehara, K. Toyota, R. Fukuda, J. Hasegawa, M. Ishida, T. Nakajima, Y. Honda, O. Kitao, H. Nakai, T. Vreven, K. Throssell, J. A. Montgomery, Jr., J. E. Peralta, F. Ogliaro, M. J. Bearpark, J. J. Heyd, E. N. Brothers, K. N. Kudin, V. N. Staroverov, T. A. Keith, R. Kobayashi, J. Normand, K. Raghavachari, A. P. Rendell, J. C. Burant, S. S. Iyengar, J. Tomasi, M. Cossi, J. M. Millam, M. Klene, C. Adamo, R. Cammi, J. W. Ochterski, R. L. Martin, K. Morokuma, O. Farkas, J. B. Foresman, and D. J. Fox, Gaussian, Inc., Wallingford CT, 2019.
